# Supplementary material for: Assessing health-related quality of life of patients with colorectal cancer using EQ-5D-5L: a cross-sectional study in Heilongjiang of China
Source: PubMed Central journal article supplement — BMJ Open. 2018 Dec 6;8(12):e022711. doi: 10.1136/bmjopen-2018-022711 (PMC6286482; doi:10.1136/bmjopen-2018-022711), 2018-12-06
Supplement: bmjopen-2018-022711.draft_revisions.pdf [file bmjopen-2018-022711.draft_revisions.pdf]

# BMJ Open

BMJ Open is committed to open peer review. As part of this commitment we make the peer review history of every article we publish publicly available.

When an article is published we post the peer reviewers' comments and the authors' responses online. We also post the versions of the paper that were used during peer review. These are the versions that the peer review comments apply to.

The versions of the paper that follow are the versions that were submitted during the peer review process. They are not the versions of record or the final published versions. They should not be cited or distributed as the published version of this manuscript.

BMJ Open is an open access journal and the full, final, typeset and author-corrected version of record of the manuscript is available on our site with no access controls, subscription charges or pay-per-view fees (<http://bmjopen.bmj.com>).

If you have any questions on BMJ Open's open peer review process please email [editorial.bmjopen@bmj.com](mailto:editorial.bmjopen@bmj.com)

# BMJ Open

## Valuing health-related quality of life of patients with colorectal cancer in China using EQ-5D-5L

|                               |                                                                                                                                                                                                                                                                                                                                                                                                                                                                                                                                                                                            |
|-------------------------------|--------------------------------------------------------------------------------------------------------------------------------------------------------------------------------------------------------------------------------------------------------------------------------------------------------------------------------------------------------------------------------------------------------------------------------------------------------------------------------------------------------------------------------------------------------------------------------------------|
| Journal:                      | <i>BMJ Open</i>                                                                                                                                                                                                                                                                                                                                                                                                                                                                                                                                                                            |
| Manuscript ID                 | bmjopen-2018-022711                                                                                                                                                                                                                                                                                                                                                                                                                                                                                                                                                                        |
| Article Type:                 | Research                                                                                                                                                                                                                                                                                                                                                                                                                                                                                                                                                                                   |
| Date Submitted by the Author: | 08-Mar-2018                                                                                                                                                                                                                                                                                                                                                                                                                                                                                                                                                                                |
| Complete List of Authors:     | Huang, Weidong; Harbin Medical University, School of Health Management<br>Yang, Jinjin; Harbin Medical University, School of Health Management<br>Liu, Yang; Harbin Medical University, School of Health Management<br>Liu, Chaojie; La Trobe University, School of Psychology and Public Health<br>zhang, xin; harbin medical university, school of Health Management<br>Fu, Wenqi; Harbin Medical University, School of Health Management<br>Shi, Limei; Harbin Medical University, School of Health Management<br>Liu, Guoxiang; Harbin Medical University, School of Health Management |
| Keywords:                     | Health-Related Quality of Life, Colorectal Cancer, EQ-5D-5L                                                                                                                                                                                                                                                                                                                                                                                                                                                                                                                                |
|                               |                                                                                                                                                                                                                                                                                                                                                                                                                                                                                                                                                                                            |

SCHOLARONE™  
Manuscripts

Peer Review Only

1  
2  
3  
4 **Valuing health-related quality of life of patients with colorectal**  
5  
6 **cancer in China using EQ-5D-5L**  
7  
8  
9

10 Weidong Huang<sup>1§</sup>, Jinjin Yang<sup>1§</sup>, Yang Liu<sup>1</sup>, Chaojie Liu<sup>2</sup>, Xin Zhang<sup>1</sup>, Wenqi Fu<sup>1</sup>,  
11 Linmei Shi<sup>1</sup>, Guoxiang Liu<sup>1\*</sup>  
12

13  
14 <sup>1</sup>School of Health Management, Harbin Medical University, 157 Baojian Road,  
15 Nangang District, Harbin 150086, China.  
16

17 <sup>2</sup>School of Psychology and Public Health, La Trobe University, Melbourne VIC 3086,  
18 Australia.  
19

20 Huang, Weidong; [weidong218@126.com](mailto:weidong218@126.com); Harbin Medical University, School of  
21 Health Management  
22

23  
24 Yang, Jinjin; [hrbmuyjj@126.com](mailto:hrbmuyjj@126.com); Harbin Medical University, School of Health  
25 Management  
26

27 Liu, Yang; [liuyangly1989@163.com](mailto:liuyangly1989@163.com); Harbin Medical University, School of Health  
28 Management  
29

30  
31 Liu, Chaojie; [c.liu@latrobe.edu.au](mailto:c.liu@latrobe.edu.au); La Trobe University, School of Psychology  
32 and Public Health  
33

34  
35 Zhang, Xin; [zhangxinzhx0801@126.com](mailto:zhangxinzhx0801@126.com); Harbin Medical University, School of  
36 Health Management  
37

38  
39 Fu, Wenqi; [fuwenqi6688@163.com](mailto:fuwenqi6688@163.com); Harbin Medical University, School of Health  
40 Management  
41

42  
43 Shi, Linmei; [slm\\_jl@163.com](mailto:slm_jl@163.com); Harbin Medical University, School of Health  
44 Management  
45

46  
47 Liu, Guoxiang; [lgx6301@163.com](mailto:lgx6301@163.com); Harbin Medical University, School of Health  
48 Management  
49

50 <sup>§</sup>These authors made equal contributions.

51  
52 <sup>\*</sup> Authors to whom correspondence should be addressed –Guoxiang Liu, E-mail:  
53 [lgx6301@163.com](mailto:lgx6301@163.com), Tel: 86-451-87502863.

54  
55 The work was carried out in School of Health Management, Harbin Medical  
56 University, 157 Baojian Road, Nangang District, Harbin 150086, China.  
57  
58  
59  
60

## Abstract

**Aim** This study aimed to assess the Health-Related Quality of Life (HRQoL) of patients with Colorectal Cancer (CRC) and its determinants.

**Method** A cross-sectional questionnaire survey was conducted on 300 CRC patients in China's Heilongjiang province, measuring HRQoL using the EQ-5D-5L. Kruskal-Wallis analyses were performed to identify independent variables associated with the EQ-5D-5L utility scores. Predictors of the utility scores were confirmed using a Tobit regression model.

**Results** The respondents had a mean EQ-5D-5L utility score of 0.617 (SD =0.371) and a median of 0.740 (range: -0.348 to 1.000). Pain/discomfort and anxiety/depression were major complaints of the respondents, with a prevalence of over 60%. The Kruskal-Wallis analyses found lower utility scores in those who were not married, worked as a farmer, enrolled with the new rural cooperative medical scheme, and had lower household income ( $p<0.05$ ). Those who were at a later stage of CRC, underwent surgical only therapy, and had a fistula also had lower EQ-5D-5L scores than others ( $p<0.05$ ). The Tobit regression model confirmed these predictors, except for occupation and marital status.

**Conclusion** CRC patients have poor HRQoL. Efforts should be made to improve the management of pain/discomfort and anxiety/depression. Socio-economic status is a predictor of HRQoL.

**Keywords:** Health-Related Quality of Life; Colorectal Cancer; EQ-5D-5L

### Strengths and limitations of this study

*I* This study assessed the health-related quality of life of patients with Colorectal Cancer(CRC) and its determinants in China with EQ-5D-5L which have scarcely been studied.

*II* The utility scores for CRC patients measured by the EQ-5D-5L can be used for health economic evaluations on clinical and public health interventions on CRC.

*III* The study was conducted in three large hospitals in one province, which may limit the generalisability of this study's findings.

## Introduction

Colorectal cancer (CRC) is one of the most life-threatening cancers in the world: the third in prevalence (after lung and breast cancer) and the fourth in mortality (after lung, liver and gastric cancer). It was estimated that 746,298 new cases of CRC were diagnosed in 2012 and 693,881 patients died from CRC worldwide [1]. Most CRC patients live in China. Around 376,300 new cases of CRC were diagnosed in China alone in 2015. CRC has become the fifth leading cause of cancer death in China (around 191,000 CRC patients died in 2015) [2].

Cancer is a devastating event for patients and their families. Living with cancer is a stressful experience. The therapeutic treatment for cancer often involves highly invasive surgical procedures, exposure to radiations and poisonous chemical medications despite uncertain prospects in many cases. The combined effect of cancer itself and adverse events associated with cancer treatment can lead to serious decline in health-related quality of life (HRQoL) of cancer patients [3].

HRQoL is a kind of patient reported outcome, which has been increasingly used for supporting clinical and public health decisions [3]. Assessing patient reported outcome is particularly important for cancer because of the complexities of cancer events and cancer treatment. Cancer treatment is often very expensive with limited prospects of remission. Patient reported outcome presents an alternative option of evidence for decision making [4, 5].

However, the application of patient reported outcome has been compounded by its subjective nature. People's preference needs to be considered in quantifying and interpreting the results of patient reported outcome. Some researchers argue that people with different experiences (such as those with and without cancer) may give different preferences to the same health state [6]. Nevertheless, the use of public preference for assessing patient reported outcome has prevailed in health economic studies. This approach simplifies the preference scoring algorithm and justifies decisions from the perspective of a more representative population.

Several HRQoL instruments are available with a scoring system based on public

1  
2  
3 preference, such as the EuroQol five-dimension (EQ-5D) [7], the Health Utilities  
4 Index (HUI)[8], and the Short Form six-dimension (SF-6D) survey [9]. Their scoring  
5 algorithms are all anchored on 1.0 (full health) and 0 (death), with a negative score  
6 representing a health state worse than death.  
7  
8  
9

10 The EQ-5D is perhaps the most widely used instrument for assessing HRQoL  
11 based on public preference. It has been recommended by many researchers and  
12 governmental agencies [10]. Extensive studies have been undertaken using the  
13 EQ-5D-3L for assessing HRQoL [11-15], because a scoring algorithm based on the  
14 preference of general public is available in many countries such as Finland [11],  
15 Turkey [12], the United Kingdom [13], and the Netherlands [15]. These include some  
16 studies on CRC patients [11-17]. Although a few studies have been conducted in  
17 China, investigating into the HRQoL of CRC patients [18], most have failed to  
18 generate a preference based score simply because of the absence of a scoring  
19 algorithm.  
20  
21  
22  
23  
24  
25  
26  
27  
28

29 The EQ-5D-5L was developed based on its predecessor EQ-5D-3L. It expanded  
30 the number of combined health states and is therefore believed to be more sensitivity  
31 for detecting clinically important differences in HRQoL [19]. Recently, a scoring  
32 algorithm for the EQ-5D-5L was developed from a representative sample of adult  
33 general population in China [20]. This study used the EQ-5D-5L to assess HRQoL of  
34 CRC patients and its determinants.  
35  
36  
37  
38  
39  
40  
41  
42

## 43 **Methods**

### 44 **Study subjects**

45 A cross-sectional questionnaire survey was conducted in Heilongjiang province,  
46 northeastern of China, a province with about 38 million population. Heilongjiang  
47 ranks in the middle range in China in terms of its socioeconomic development, with  
48 \$6,386 per capita GDP in 2015 [21].  
49  
50  
51  
52

53 Three major centers for cancer treatment participated in the study, each being  
54 located in a tertiary hospital in Harbin, the capital city of Heilongjiang province. They  
55  
56  
57  
58  
59  
60

1  
2  
3 provide specialist care to cancer patients across the entire province.  
4  
5

6 Data were collected between December 2016 and April 2017. The CRC patients  
7 who received treatment in the three centers over the period were invited to enroll in  
8 this study. They had to 1) be clinically diagnosed with primary CRC; 2) be able to  
9 read, write, and speak in Chinese; and 3) be able to give informed consent. Those who  
10 were deemed incapable of completing the questionnaire due to physical and  
11 psychological difficulties were excluded from the study. The eligibility of participants  
12 was assessed by 8 trained interviewers with assistance from the medical doctors.  
13 These interviewers were recruited from research students in a medical university and  
14 had no servicing relationship with the patients. Training was offered to the  
15 interviewers prior to the survey.  
16  
17  
18  
19  
20  
21

22 A total of 346 eligible participants were identified by the interviewers. Of these  
23 identified participants, 26 declined to participate; ten were excluded because they  
24 were not made aware of their diagnoses; ten were excluded for other reasons. This  
25 resulted in a final sample size of 300.  
26  
27  
28

### 29 **Patient and Public Involvement**

30  
31 Patients included were selected by means of convenience sampling. All  
32 participants in this study understood the purpose of the study, agreed with it and  
33 signed the Informed Consent Term. The survey was administered through face-to-face  
34 interviews in a private office in the participating centers. But the respondents were  
35 encouraged to self complete the questionnaire. Assistance from the interviewers  
36 would be offered if requested. The interviewers collected and reviewed the  
37 questionnaires immediately once they were returned. The results will be fed back to  
38 the patient if needed.  
39  
40  
41  
42  
43  
44

45 The study protocol was reviewed and approved by the Research Ethics  
46 Committee, Public Health College of Harbin Medical University (Code:  
47 HMUIRB2014012).  
48  
49

### 50 **Measurement**

#### 51 **Dependent variable: EQ-5D-5L score**

52 The HRQoL of respondents was assessed by the EQ-5D-5L, which had been validated  
53 in cancer patients [22]. It measured problems in five dimensions: mobility, self-care,  
54  
55  
56  
57  
58  
59



1  
2  
3 usual activities, pain/discomfort, and anxiety/depression. Each dimension was rated  
4 along a five level scale: no problem, slight problem, moderate problem, severe  
5 problem, and extreme problem [23]. Responses to the five dimensions generated 3125  
6 (5<sup>5</sup>) combinations of HRQoL states, with “11111” indicating “no problems at all” and  
7 “55555” indicating “extreme problems” in all five dimensions. Each combination was  
8 then be given a single score using a scoring algorithm based on public preference. In  
9 health economics, this is usually called “utility score”. In this study, we used the  
10 Chinese EQ-5D-5L value set [20] to estimate the utility score for each respondent,  
11 which ranged from -0.391 to 1.000.  
12  
13

### 14 **Independent variables**

15 Candidate variables that potential associated with HRQoL of CRC patients included  
16 those variables that met one of the following three criteria: (1) socio-economic status;  
17 (2) clinical association with the outcome of interest; and (3) previously shown to be  
18 associated with the health-related quality of life among Chinese population[24]. This  
19 hypothesis was developed in line with several systematic reviews [24-26]. Thus, we  
20 identified a set of candidate variables, including: data about the clinical characteristics  
21 of respondents were collected through a review of medical records, which included  
22 the stage of CRC (I, II, III, IV), therapeutic regimen (surgery,  
23 radiotherapy/chemotherapy, surgery followed by postoperative chemotherapy,  
24 Chemotherapy followed by surgery), and presence of Fistula (yes or no). The  
25 socio-demographic characteristics of respondents were collected through the  
26 questionnaire survey, which included sex, age, religion, ethnicity, education, marital  
27 status, occupation, medical insurance, and household income.  
28  
29  
30  
31  
32  
33  
34  
35  
36  
37  
38  
39  
40  
41  
42  
43  
44  
45  
46

### 47 **Statistical analysis**

48 The final statistical analyses included 300 questionnaires, excluding five that  
49 contained some missing data.  
50

51 The EQ-5D-5L utility scores of respondents followed a non-normal distribution  
52 (Kolmogorov-Smirnov test,  $p < 0.05$ ). We presented both mean (standard deviation,  
53 SD) and median (range) scores and applied Kruskal-Wallis analyses to determine  
54  
55  
56  
57  
58  
59  
60

1  
2  
3 differences in the utility scores of the respondents with different characteristics.  
4

5 We then established a Tobit regression model on the EQ-5D-5L utility scores,  
6 including all of the independent variables that showed statistical significance ( $p < 0.05$ )  
7 in the Kruskal-Wallis analyses. The ceiling effect is common in HRQoL studies, in  
8 which a significant number of respondents report the highest score [27-29]. This is  
9 particularly evident with the EQ-5D instruments[29, 30] leading to some utility scores  
10 censored at 1.0. In this study, 16.7% respondents scored the highest possible score 1.0,  
11 which argue that a general linear regression model is inappropriate for censored data  
12 because the values do not necessarily represent the exact values once they reached the  
13 censored threshold. For censored data, Tobit regression model is advised [27-29, 31,  
14 32].  
15  
16  
17  
18  
19  
20  
21  
22

23 All statistical analyses were conducted using the SPSS version 18 and the STATA  
24 version 12.0. A p value of less than 0.05 was considered an indication of statistical  
25 significance.  
26  
27  
28

## 29 **Results**

30  
31 The respondents had a mean age of 59 years (ranging from 28 years to 84 years). The  
32 majorities were men (65%), married (90%), ethnic Han (96%), and had no religious  
33 belief (94%). About 17% of the respondents obtained a university degree. All of the  
34 respondents were covered by social health insurance, albeit across three different  
35 schemes. Their household income was higher compared with the average level  
36 (¥27,830) in Heilongjiang. About half of the respondents were still in paid workforce  
37 at the time of the survey. More than half (54%) of respondents received surgical  
38 treatment, but only 16.33% had a fistula. Most patients were at stage II (37.0%) and  
39 stage III (38.0%) of CRC (Table 1).  
40  
41  
42  
43  
44  
45  
46  
47  
48  
49

50 Problems in pain/discomfort were most frequently reported (60%), followed by  
51 anxiety/depression (59%), usual activities (53%), self-care (49%), and mobility (46%).  
52 About 16.7% of respondents report no problems at all in all five dimensions (Table 2).  
53  
54  
55

56 The respondents had an average utility score of 0.617 and a median of 0.740  
57  
58  
59

(Table 3). No significant differences in the utility scores were found in those with different age, sex, ethnicity, religious belief, and level of education ( $p>0.10$ ). Lower EQ-5D-5L utility scores were found in those who were not married, worked as a farmer, enrolled with the new rural cooperative medical scheme, and had lower income ( $p<0.05$ ). The EQ-5D-5L utility scores also varied with clinical characteristics. Those who were at a later stage of CRC, underwent surgical treatment only, and had a fistula had lower utility scores compared with others ( $p<0.05$ ).

The Tobit regression model confirmed that low household income, membership with the new rural cooperative medical scheme, a later stage of CRC, surgical only therapy, and presence of fistula were significant predictors of low EQ-5D-5L utility scores. However, occupation and marital status became statistically insignificant in predicting utility scores after controlling for other factors (Table 4).

## Discussion

Understanding CRC patients' HRQoL and factors associated with it is essential in evaluating future health technologies. To the best of our knowledge, this is the first study to present utility scores for CRC patients measured by the EQ-5D-5L. The results can be used for health economic evaluations on clinical and public health interventions on CRC. Previous attempts on cost-utility analyses on CRC interventions have been deterred by the lack of such utility scores [4]. The baseline health utility values, defined in the present study by using the EQ-5D-5L questionnaire, could be used by researchers in the calculation of quality adjusted life-years, which are central to economic evaluations including cost-utility analysis.

This study found that CRC patients live with significantly lower HRQoL than the local general public as measured by the EQ-5D utility scores [29]. This finding is consistent with previous studies [11, 13, 17]. The CRC participants of our study also appear to have lower utility scores than those from Finland [11] Japan[33] and the UK [14]. In a Finnish health survey, the mean score for cancer patients was 0.813

1  
2  
3 measured by the EQ-5D, compared with our 0.614[11]. In a Japanese study  
4 investigating the HRQoL score of long-term survivors, the EQ-5D was 0.865 in  
5 nonstoma patients and 0.842 in patients with a stoma [33]. The mean score of EQ-5D  
6 was 0.79 in a single-center and prospective study in United Kingdom[14]. However,  
7 interpretation of such differences needs to be cautious because the Finland, Japan and  
8 UK studies used the EQ-5D-3L and the same EQ-5D-3L valuation algorithm (UK  
9 TTO). Empirical evidence shows that the EQ-5D-5L has lower ceiling effect and  
10 higher discriminatory power than the EQ-5D-3L [11, 14, 22]; and the Chinese general  
11 public prefers lower values on most conditions than their Western counterparts[29]. In  
12 addition, the characteristics of our CRC patients may also differ from those of other  
13 studies. Especially in our study, the patients from tertiary hospitals usually have a  
14 heavier condition in China[34].  
15  
16  
17  
18  
19  
20  
21  
22  
23  
24

25 We found that pain/discomfort is the most frequently reported problem (60%) of  
26 respondents, similar to that reported by CRC patients in the Netherlands and the UK  
27 [15]. This study also revealed that 59% of CRC patients experienced  
28 anxiety/depression. Indeed, anxiety/depression is perhaps the most common  
29 psychological problem among all cancer patients [35, 36]. Further efforts should be  
30 made to improve the management of pain/discomfort and anxiety/depression.  
31  
32  
33  
34  
35

36 There is some debate about the association between HRQoL and the stage of  
37 CRC. We found a decreasing trend in HRQoL with the progress of CRC, consistent  
38 with those reported in Australia and some European countries [26, 37-39]. However  
39 Hornbrook and colleagues reported worse HRQoL in patients with stage II CRC  
40 compared with those in stage III and IV [17].  
41  
42  
43  
44

45 CRC patients undergoing surgical procedures often have lower HRQoL [26, 40].  
46 Our study provides additional evidence to this conclusion. It is widely accepted that  
47 surgical procedures are usually associated with increased pain/discomfort,  
48 complications, and inconvenience to daily activities. However, it is not clear why  
49 surgery in combination with other treatment measures can produce a higher utility  
50 score than surgery alone. The presence of fistula is a clear indication of poor HRQoL.  
51 A HRQoL instrument (mCOH-QOL-Ostomy) has been developed specifically for  
52  
53  
54  
55  
56  
57  
58  
59  
60

1  
2  
3 CRC patients with fistula [41].  
4

5 Low socio-economic status is a significant predictor of low HRQoL in CRC  
6 patients. In this study, household income and social health insurance entitlements  
7 were found to be associated with HRQoL of CRC patients, consistent with findings of  
8 previous studies conducted in China [18] and some other countries [37, 38]. Medical  
9 treatment for CRC is very expensive. A survey of 37 tertiary hospitals in 13 provinces  
10 in China revealed a high level of catastrophic expenditure for CRC patients [42]. This  
11 is a particular concern for those living with low income and those with limited  
12 insurance entitlements. Although China has achieved universal health insurance  
13 coverage, considerable disparities exist in terms of the entitlements across the three  
14 government subsidized basic health insurance programs [43]. Rural patients in China  
15 are not only more likely to have lower household income, but also are least protected  
16 by their health insurance coverage, the new rural cooperative medical scheme. They  
17 usually bear a higher proportion of out-of-pocket expenses than their urban  
18 counterparts do.  
19  
20  
21  
22  
23  
24  
25  
26  
27  
28  
29

30 This study has several limitations. As a cross-sectional survey, no causal  
31 relationships can be assumed. The study was conducted in three large hospitals in one  
32 province, which is not a representative sample of China: generalization of the results  
33 needs to be cautious. It is also important to note that the sample was drawn from  
34 hospital settings and was biased toward more advanced cancers [44].  
35  
36  
37  
38  
39

40 In conclusion, this study presents utility scores for CRC patients measured by the  
41 EQ-5D-5L. CRC patients have poor HRQoL, with pain/discomfort and  
42 depression/anxiety as the most frequently reported problems. The HRQoL of CRC  
43 patients is associated with the stage of CRC and treatment regimen. But low  
44 socio-economic status such as low levels of income and insurance entitlements is also  
45 a predictor of low HRQoL.  
46  
47  
48  
49  
50  
51  
52  
53  
54  
55  
56  
57  
58  
59  
60

### **Ethical Statements and consent to participate**

This study was approved by the Ethics Committee of Harbin Medical University (Project Identification Code: HMUIRB2014012). All procedures performed in studies involving human participants were in accordance with the ethical standards of the institutional and/or national research committee and with the 1964 Helsinki declaration and its later amendments or comparable ethical standards. Informed consent was obtained from all individual participants included in the study.

### **Acknowledgements**

The authors are most grateful to the study participants.

### **Funding**

This study was funded by the National Natural Scientific Foundation of China (Grant No.71503062, 71673071), the Heilongjiang Postdoctoral Fund (Grant No. LBH-Z16137, LBH-Z16240), the China Postdoctoral Fund (Grant No. 2017M611402), the Key Lab of Health Technology Assessment, National Health and Family Planning Commission of China (Fudan University)(Grant No. FHTA2017-08).

### **Authors' Contributions**

JY participated in the design of the study and the writing of the manuscript. WH designed the study, performed the statistical analyses and drafted the manuscript. GL supervised and interpreted the statistical findings and wrote the manuscript. YL and CL helped draft the manuscript. WF, LS and XZ conceived the study and participated in the design. All authors read and approved the final manuscript.

### **Disclosure Statement**

None

### **Data sharing statement**

Data are available from the corresponding author on request.

## Reference

1. Ferlay J, Ervik M, Dikshit R, Eser S, Mathers C, Rebelo M, Parkin DM, Forman D, Bray F. GLOBOCAN 2012 v1.1, Cancer Incidence and Mortality Worldwide: IARC CancerBase No. 11. 2014
2. Chen W, Zheng R, Baade PD, Zhang S, Zeng H, Bray F, et al. Cancer statistics in China, 2015. *CA: a cancer journal for clinicians* 2016; **66**: 115-32.
3. Ravens-Sieberer U. Measuring and monitoring quality-of-life in population surveys: Still a challenge for public health research. *Sozial- und Präventivmedizin* 2002; **47**: 203-4.
4. Huang W, Liu G, Zhang X, Fu W, Zheng S, Wu Q, et al. Cost-effectiveness of colorectal cancer screening protocols in urban Chinese populations. *PloS one* 2014; **9**: e109150.
5. Drummond MF, Sculpher M, Torrance G, O'Brien B, Stoddart G. (2005 3rd ed edition) *Methods for the Economic Evaluation of Health Care Programmes*. Oxford University Press, New York.
6. Greenberg D, Earle C, Fang CH, Eldar-Lissai A, Neumann PJ. When is cancer care cost-effective? A systematic overview of cost-utility analyses in oncology. *Value in Health* 2010; **102**: 82.
7. Brooks R. EuroQol: the current state of play. *Health Policy* 1996; **37**: 53.
8. Feeny DD, Furlong W, Boyle M, Torrance GW. Multi-Attribute Health Status Classification Systems. *Pharmacoeconomics* 1995; **7**: 490-502.
9. Kharroubi SA, Brazier JE, Roberts J, O'Hagan A. Modelling SF-6D health state preference data using a nonparametric Bayesian method. *Journal of Health Economics* 2007; **26**: 597-612.
10. Räsänen P, Roine E, Sintonen H, Semberg-Konttinen V, Ryyänänen OP, Roine R. Use of quality-adjusted life years for the estimation of effectiveness of health care: A systematic literature review. *International Journal of Technology Assessment in Health Care* 2006; **22**: 235.
11. Farkkila N, Sintonen H, Saarto T, Jarvinen H, Hanninen J, Taari K, et al. Health-related quality of life in colorectal cancer. *Colorectal disease : the official journal of the Association of Coloproctology of Great Britain and Ireland* 2013; **15**: e215-22.
12. Polat U, Arpacı A, Demir S, Erdal S, Yalcin S. Evaluation of quality of life and anxiety and depression levels in patients receiving chemotherapy for colorectal cancer: impact of patient education before treatment initiation. *Journal of gastrointestinal oncology* 2014; **5**: 270-5.
13. Downing A, Morris EJ, Richards M, Corner J, Wright P, Sebag-Montefiore D, et al. Health-related quality of life after colorectal cancer in England: a patient-reported outcomes study of individuals 12 to 36 months after diagnosis. *Journal of clinical oncology : official journal of the American Society of Clinical Oncology* 2015; **33**: 616-24.
14. Wilson TR, Alexander DJ, Kind P. Measurement of health-related quality of life in the early follow-up of colon and rectal cancer. *Diseases of the colon and rectum* 2006; **49**: 1692-702.
15. Stein D, Joulain F, Naoshy S, Iqbal U, Muszbek N, Payne KA, et al. Assessing health-state utility values in patients with metastatic colorectal cancer: a utility study in the United Kingdom and the Netherlands. *International journal of colorectal disease* 2014; **29**: 1203-10.
16. Hornbrook MC, Wendel CS, Coons SJ, Grant M, Herrinton LJ, Mohler MJ, et al. Complications Among Colorectal Cancer Survivors. *Medical Care* 2011; **49**: 321-6.
17. Wong CK, Lam CL, Poon JT, Kwong DL. Clinical correlates of health preference and generic health-related quality of life in patients with colorectal neoplasms. *PloS one* 2013; **8**: e58341.
18. Wang JW, Sun L, Ding N, Li J, Gong XH, Chen XF, et al. The association between comorbidities and the quality of life among colorectal cancer survivors in the People's Republic of China.



- 1  
2  
3 *Patient preference and adherence* 2016; **10**: 1071-7.
- 4 19. Herdman M, Gudex C, Lloyd A, Janssen M, Kind P, Parkin D, et al. Development and  
5 preliminary testing of the new five-level version of EQ-5D (EQ-5D-5L). *Quality of Life Research*  
6 *An International Journal of Quality of Life Aspects of Treatment Care & Rehabilitation* 2011;  
7 **20**: 1727.
- 8  
9 20. Luo N, Liu G, Li M, Guan H, Jin X, Randhendriksen K. Estimating an EQ-5D-5L Value Set for  
10 China. *Value in Health* 2017; **20**: 662-9.
- 11 21. Statistics HPBo. (2015) *Heilongjiang Statistical Yearbook*. China Statistics Press, Peking.
- 12 22. Kim SH, Kim HJ, Lee SI, Jo MW. Comparing the psychometric properties of the EQ-5D-3L and  
13 EQ-5D-5L in cancer patients in Korea. *Quality of Life Research An International Journal of*  
14 *Quality of Life Aspects of Treatment Care & Rehabilitation* 2012; **21**: 1065-73.
- 15 23. Group EQC. EuroQol--a new facility for the measurement of health-related quality of life.  
16 *Health Policy* 1990; **16**: 199-208.
- 17 24. Hu X, Gong Y, Wang C, Zhang Y, Feng X. The quality of life for patient with colorectal neoplasm  
18 and its influential factors. *Tumor* 2003: 343-5.
- 19 25. Bours MJ, Bw VDL, Winkels RM, van Duijnhoven FJ, Mols F, van Roekel EH, et al. Candidate  
20 Predictors of Health-Related Quality of Life of Colorectal Cancer Survivors: A Systematic  
21 Review. *Oncologist* 2016; **21**
- 22 26. Der BWAL, Van. Predictors of health-related quality of life of colorectal cancer survivors: a  
23 systematic literature review. 2016
- 24 27. Sullivan PW, Ghushchyan VH. EQ-5D Scores for Diabetes-Related Comorbidities. *Value in*  
25 *health : the journal of the International Society for Pharmacoeconomics and Outcomes*  
26 *Research* 2016; **19**: 1002-8.
- 27 28. Sullivan PW, Ghushchyan VH, Globe G, Sucher B. Health-related quality of life associated with  
28 systemic corticosteroids. *Quality of life research : an international journal of quality of life*  
29 *aspects of treatment, care and rehabilitation* 2017; **26**: 1037-58.
- 30 29. Huang W, Yu H, Liu C, Liu G, Wu Q, Zhou J, et al. Assessing Health-Related Quality of Life of  
31 Chinese Adults in Heilongjiang Using EQ-5D-3L. *International Journal of Environmental*  
32 *Research & Public Health* 2017; **14**
- 33 30. Bharmal M, Rd TJ. Comparing the EQ-5D and the SF-6D descriptive systems to assess their  
34 ceiling effects in the US general population. *Value in Health the Journal of the International*  
35 *Society for Pharmacoeconomics & Outcomes Research* 2006; **9**: 262.
- 36 31. Twisk J, Rijmen F. Longitudinal tobit regression: a new approach to analyze outcome variables  
37 with floor or ceiling effects. *Journal of Clinical Epidemiology* 2009; **62**: 953-8.
- 38 32. Tran BX, Ohinmaa A, Long TN. Quality of life profile and psychometric properties of the  
39 EQ-5D-5L in HIV/AIDS patients. *Health & Quality of Life Outcomes* 2012; **10**: 132.
- 40 33. HAMASHIMA, CHISATO. Long-term quality of life of postoperative rectal cancer patients.  
41 *Journal of Gastroenterology & Hepatology* 2002; **17**: 571-6.
- 42 34. Gao K, Gan X. Medical Units Distribution and Influence Factors on the Selection of Patients.  
43 *Chinese Health Service Management* 2014; **31**: 516-7.
- 44 35. Strong V, Waters R, Hibberd C, Rush R, Cargill A, Storey D, et al. Emotional distress in cancer  
45 patients: the Edinburgh Cancer Centre symptom study. *British journal of cancer* 2007; **96**:  
46 868.
- 47 36. Soa WKW, Ling WM, Leung FY, Lo JCK, Yeung M, Li GKH. Anxiety, depression and quality of life  
48  
49  
50  
51  
52  
53  
54  
55  
56  
57  
58  
59  
60



- among Chinese breast cancer patients during adjuvant therapy. *European Journal of Oncology Nursing* 2010; **14**: 17-22.
37. Paika V, Creed F, Kampletsas EO, Sifaka V, Gkika S, Mavreas V, et al. Personality variables are associated with colorectal cancer patients' quality of life independent of psychological distress and disease severity. *Psychooncology* 2010; **19**: 273-82.
38. Sharma A, Sharp DM, Walker LG, Monson JRT. Predictors of Early Postoperative Quality of Life after Elective Resection for Colorectal Cancer. *Annals of Surgical Oncology* 2007; **14**: 3435-42.
39. Rinaldis M, Pakenham KI, Lynch BM. Relationships between quality of life and finding benefits in a diagnosis of colorectal cancer. *British Journal of Psychology* 2010; **101**: 259.
40. Chambers SK, Meng X, Youl P, Aitken J, Dunn J, Baade P. A five-year prospective study of quality of life after colorectal cancer. *Quality of life research : an international journal of quality of life aspects of treatment, care and rehabilitation* 2012; **21**: 1551-64.
41. Liu L, Herrinton LJ, Hornbrook MC, Wendel CS, Grant M, Krouse RS. Early and late complications among long-term colorectal cancer survivors with ostomy or anastomosis. *Diseases of the colon and rectum* 2010; **53**: 200-12.
42. Huang HY, Shi JF, Guo LW, Zhu XY, Wang L, Liao XZ, et al. Expenditure and financial burden for common cancers in China: a hospital-based multicentre cross-sectional study. *Lancet* 2016; **388**: S10-S.
43. Dong K. Medical insurance system evolution in China ☆. *China Economic Review* 2009; **20**: 591-7.
44. Yang SM, Li JY, Gale RP, Huang XJ. The mystery of chronic lymphocytic leukemia (CLL): Why is it absent in Asians and what does this tell us about etiology, pathogenesis and biology? *Blood Reviews* 2015; **29**: 205-13.

**Table 1** Socio-demographic and clinical characteristics of respondents

| Characteristic            | N   | %     |
|---------------------------|-----|-------|
| <b>Sex</b>                |     |       |
| Male                      | 195 | 65.00 |
| Female                    | 105 | 35.00 |
| <b>Age (years)</b>        |     |       |
| ≤ 40                      | 50  | 16.67 |
| 50-59                     | 92  | 30.67 |
| 60-69                     | 105 | 35.00 |
| ≥ 70                      | 53  | 17.66 |
| <b>Religious belief</b>   |     |       |
| Yes                       | 18  | 6.00  |
| No                        | 282 | 94.00 |
| <b>Ethnicity</b>          |     |       |
| Han                       | 288 | 96.00 |
| Other                     | 12  | 4.00  |
| <b>Level of education</b> |     |       |
| Primary school or below   | 64  | 21.33 |

|    |                                                |            |            |
|----|------------------------------------------------|------------|------------|
| 1  |                                                |            |            |
| 2  |                                                |            |            |
| 3  | Junior high school                             | 103        | 34.34      |
| 4  | Senior high school                             | 82         | 27.33      |
| 5  | University                                     | 51         | 17.00      |
| 6  | <b>Marital status</b>                          |            |            |
| 7  | Married                                        | 270        | 90.00      |
| 8  | Other                                          | 30         | 10.00      |
| 9  |                                                |            |            |
| 10 | <b>Occupation</b>                              |            |            |
| 11 | Public sector employee                         | 38         | 12.67      |
| 12 | Private sector employee                        | 36         | 12.00      |
| 13 | Self-employed or unemployed                    | 55         | 18.33      |
| 14 | Farmer                                         | 63         | 21.00      |
| 15 | Retired                                        | 108        | 36.00      |
| 16 |                                                |            |            |
| 17 | <b>Health insurance</b>                        |            |            |
| 18 | Basic medical insurance for urban employees    | 154        | 51.33      |
| 19 | Basic medical insurance for urban residents    | 62         | 20.67      |
| 20 | New rural cooperative medical scheme           | 84         | 28.00      |
| 21 |                                                |            |            |
| 22 | <b>Annual household income (Yuan)</b>          |            |            |
| 23 | <20000                                         | 56         | 18.67      |
| 24 | 20000–39999                                    | 84         | 28.00      |
| 25 | 40000-59999                                    | 72         | 24.00      |
| 26 | 60000-79999                                    | 39         | 13.00      |
| 27 | >80000                                         | 49         | 16.33      |
| 28 |                                                |            |            |
| 29 | <b>Therapeutic regimen</b>                     |            |            |
| 30 | Surgery                                        | 163        | 54.33      |
| 31 | Radiotherapy/Chemotherapy                      | 44         | 14.67      |
| 32 | Surgery followed by postoperative Chemotherapy | 51         | 17.00      |
| 33 | Chemotherapy followed by surgery               | 18         | 6.00       |
| 34 | Other                                          | 24         | 8.00       |
| 35 |                                                |            |            |
| 36 | <b>Stage of DRC</b>                            |            |            |
| 37 | I                                              | 40         | 13.33      |
| 38 | II                                             | 111        | 37.00      |
| 39 | III                                            | 114        | 38.00      |
| 40 | IV                                             | 35         | 11.67      |
| 41 |                                                |            |            |
| 42 | <b>Fistula</b>                                 |            |            |
| 43 | Yes                                            | 49         | 16.33      |
| 44 | No                                             | 251        | 83.67      |
| 45 | <b>Total</b>                                   | <b>300</b> | <b>100</b> |
| 46 |                                                |            |            |
| 47 |                                                |            |            |
| 48 |                                                |            |            |
| 49 |                                                |            |            |
| 50 |                                                |            |            |
| 51 |                                                |            |            |

**Table 2** Problems reported by respondents in the five dimensions of EQ-5D-5L

| Problems | Mobility | Self-care | Usual Activity | Pain/Discomfort | Anxiety/Depression |
|----------|----------|-----------|----------------|-----------------|--------------------|
| No       | 53.7%    | 51.0%     | 46.7%          | 39.7%           | 40.7%              |
| Slight   | 14.3%    | 15.4%     | 18.3%          | 25.0%           | 23.3%              |
| Moderate | 11.3%    | 12.0%     | 13.3%          | 25.3%           | 24.3%              |

|         |       |       |       |      |      |
|---------|-------|-------|-------|------|------|
| Severe  | 10.0% | 11.3% | 12.0% | 7.0% | 9.3% |
| Extreme | 10.7% | 10.3% | 11.7% | 3.0% | 2.4% |

**Table 3** EQ-5D-5L index scores in respondents with different characteristics

|                                             | N   | Mean±SD     | Median (range)      | P            |
|---------------------------------------------|-----|-------------|---------------------|--------------|
| <b>Sex</b>                                  |     |             |                     | <b>0.942</b> |
| Male                                        | 195 | 0.614±0.378 | 0.731 (-0.348-1.00) |              |
| Female                                      | 105 | 0.621±0.361 | 0.751 (-0.348-1.00) |              |
| <b>Age</b>                                  |     |             |                     | <b>0.330</b> |
| ≤49                                         | 50  | 0.561±0.398 | 0.670 (-0.348-1.00) |              |
| 50-59                                       | 92  | 0.686±0.327 | 0.819 (-0.348-1.00) |              |
| 60-69                                       | 105 | 0.592±0.373 | 0.687(-0.251-1.00)  |              |
| ≥70                                         | 53  | 0.598±0.407 | 0.782 (-0.265-1.00) |              |
| <b>Religious belief</b>                     |     |             |                     | <b>0.537</b> |
| Yes                                         | 18  | 0.612±0.375 | 0.740 (-0.348-1.00) |              |
| No                                          | 282 | 0.683±0.302 | 0.772 (0.139-1.00)  |              |
| <b>Ethnicity</b>                            |     |             |                     | <b>0.166</b> |
| Han                                         | 288 | 0.620±0.374 | 0.749 (-0.348-1.00) |              |
| Other                                       | 12  | 0.541±0.307 | 0.618 (-0.044-0.89) |              |
| <b>Level of education</b>                   |     |             |                     | <b>0.180</b> |
| Primary school or below                     | 64  | 0.581±0.363 | 0.646 (-0.298-1.00) |              |
| Junior high school                          | 103 | 0.583±0.376 | 0.661 (-0.348-1.00) |              |
| Senior high school                          | 82  | 0.638±0.373 | 0.744 (-0.348-1.00) |              |
| University                                  | 51  | 0.696±0.365 | 0.833 (-0.201-1.00) |              |
| <b>Marital status</b>                       |     |             |                     | <b>0.026</b> |
| Married                                     | 270 | 0.635±0.359 | 0.746 (-0.348-1.00) |              |
| Other                                       | 30  | 0.452±0.445 | 0.455 (-0.348-0.95) |              |
| <b>Occupation</b>                           |     |             |                     | <b>0.007</b> |
| Public sector employee                      | 38  | 0.734±0.341 | 0.895 (-0.201-1.00) |              |
| Private sector employee                     | 36  | 0.706±0.328 | 0.833 (-0.184-1.00) |              |
| Self-employed or unemployed                 | 55  | 0.603±0.359 | 0.659 (-0.348-1.00) |              |
| Farmer                                      | 63  | 0.500±0.411 | 0.600 (-0.348-1.00) |              |
| Retired                                     | 108 | 0.621±0.326 | 0.756 (-0.201-1.00) |              |
| <b>Health insurance</b>                     |     |             |                     | <b>0.001</b> |
| Basic medical insurance for urban employees | 154 | 0.674±0.352 | 0.825 (-0.251-1.00) |              |
| Basic medical insurance for urban residents | 62  | 0.645±0.354 | 0.720 (-0.348-1.00) |              |
| New rural cooperative medical scheme        | 84  | 0.490±0.392 | 0.586 (-0.348-1.00) |              |
| <b>Annual household income (Yuan)</b>       |     |             |                     | <b>0.002</b> |
| <20000                                      | 56  | 0.505±0.419 | 0.586 (-0.348-1.00) |              |
| 20000–39999                                 | 84  | 0.566±0.369 | 0.685 (-0.348-1.00) |              |
| 40000-59999                                 | 72  | 0.625±0.375 | 0.763 (-0.251-1.00) |              |
| 60000-79999                                 | 39  | 0.691±0.300 | 0.824 (-0.044-1.00) |              |

|                                                |            |                    |                            |
|------------------------------------------------|------------|--------------------|----------------------------|
| >80000                                         | 49         | 0.759±0.315        | 0.882 (-0.201-1.00)        |
| <b>Therapeutic regimen</b>                     |            |                    | <b>0.000</b>               |
| Surgery                                        | 163        | 0.517±0.389        | 0.600 (-0.348-1.00)        |
| Radiotherapy/Chemotherapy                      | 44         | 0.757±0.271        | 0.830 (-0.071-1.00)        |
| Surgery followed by postoperative chemotherapy | 51         | 0.712±0.359        | 0.848 (-0.298-1.00)        |
| Chemotherapy followed by surgery               | 18         | 0.734±0.320        | 0.847 (-0.005-1.00)        |
| Other                                          | 24         | 0.748±0.274        | 0.854 (0.120-1.00)         |
| <b>Stage of disease</b>                        |            |                    | <b>0.001</b>               |
| I                                              | 40         | 0.768±0.296        | 0.893 (0.025-1.00)         |
| II                                             | 111        | 0.656±0.344        | 0.821 (-0.348-1.00)        |
| III                                            | 114        | 0.562±0.394        | 0.698 (-0.265-1.00)        |
| IV                                             | 35         | 0.495±0.395        | 0.637(-0.348-1.00)         |
| <b>Fistula</b>                                 |            |                    | <b>0.000</b>               |
| Yes                                            | 49         | 0.408±0.397        | 0.409 (-0.348-1.00)        |
| No                                             | 251        | 0.657±0.353        | 0.808 (-0.348-1.00)        |
| <b>Total</b>                                   | <b>300</b> | <b>0.617±0.371</b> | <b>0.740 (-0.348-1.00)</b> |

**Table 4.** Results of Tobit regression model on EQ-5D-5L index scores of respondents

| Variables                                                          | Coefficient | 95% Confidence interval |        | P value |
|--------------------------------------------------------------------|-------------|-------------------------|--------|---------|
| <b>Marital status (Ref=other )</b>                                 |             |                         |        |         |
| Married                                                            | 0.128       | -0.010                  | 0.267  | 0.070   |
| <b>Occupation (Ref=Retired)</b>                                    |             |                         |        |         |
| Public sector employee                                             | 0.069       | -0.073                  | 0.210  | 0.340   |
| Private sector employee                                            | 0.073       | -0.069                  | 0.215  | 0.313   |
| Self-employed or unemployed                                        | 0.011       | -0.139                  | 0.163  | 0.879   |
| Farmer                                                             | 0.104       | -0.080                  | 0.288  | 0.265   |
| <b>Health insurance (Ref=New rural cooperative medical scheme)</b> |             |                         |        |         |
| Urban employees basic medical insurance                            | 0.126       | -0.047                  | 0.299  | 0.152   |
| Urban residents basic medical insurance                            | 0.157       | 0.001                   | 0.313  | 0.049   |
| <b>Stage of disease (Ref=IV)</b>                                   |             |                         |        |         |
| I                                                                  | 0.626       | 0.444                   | 0.809  | 0.000   |
| II                                                                 | 0.423       | 0.273                   | 0.574  | 0.000   |
| III                                                                | 0.297       | 0.151                   | 0.442  | 0.000   |
| <b>Annual household income(Ref=&gt;80000)</b>                      |             |                         |        |         |
| <20000                                                             | -0.261      | -0.422                  | -0.100 | 0.002   |
| 20000–39999                                                        | -0.220      | -0.358                  | -0.081 | 0.002   |
| 40000-59999                                                        | -0.155      | -0.294                  | -0.016 | 0.029   |
| 60000-79999                                                        | -0.145      | -0.306                  | 0.015  | 0.076   |
| <b>Therapeutic regimen(Ref=other)</b>                              |             |                         |        |         |
| Surgery                                                            | -0.261      | -0.423                  | -0.098 | 0.002   |

|   |                                                |        |        |        |       |
|---|------------------------------------------------|--------|--------|--------|-------|
| 1 |                                                |        |        |        |       |
| 2 |                                                |        |        |        |       |
| 3 | Radiotherapy/Chemotherapy                      | 0.135  | -0.057 | 0.326  | 0.167 |
| 4 | Surgery followed by postoperative chemotherapy | 0.177  | -0.166 | 0.202  | 0.849 |
| 5 |                                                |        |        |        |       |
| 6 | Chemotherapy followed by surgery               | 0.053  | -0.178 | 0.284  | 0.653 |
| 7 | Fistula (Ref=no)                               |        |        |        |       |
| 8 | yes                                            | -0.224 | -0.337 | -0.111 | 0.000 |
| 9 |                                                |        |        |        |       |

For peer review only

# BMJ Open

## Assessing health-related quality of life of patients with colorectal cancer using EQ-5D-5L: a cross-sectional study in Heilongjiang of China

|                                 |                                                                                                                                                                                                                                                                                                                                                                                                                                                                                                                                                                                            |
|---------------------------------|--------------------------------------------------------------------------------------------------------------------------------------------------------------------------------------------------------------------------------------------------------------------------------------------------------------------------------------------------------------------------------------------------------------------------------------------------------------------------------------------------------------------------------------------------------------------------------------------|
| Journal:                        | <i>BMJ Open</i>                                                                                                                                                                                                                                                                                                                                                                                                                                                                                                                                                                            |
| Manuscript ID                   | bmjopen-2018-022711.R1                                                                                                                                                                                                                                                                                                                                                                                                                                                                                                                                                                     |
| Article Type:                   | Research                                                                                                                                                                                                                                                                                                                                                                                                                                                                                                                                                                                   |
| Date Submitted by the Author:   | 13-Jun-2018                                                                                                                                                                                                                                                                                                                                                                                                                                                                                                                                                                                |
| Complete List of Authors:       | Huang, Weidong; Harbin Medical University, School of Health Management<br>Yang, Jinjin; Harbin Medical University, School of Health Management<br>Liu, Yang; Harbin Medical University, School of Health Management<br>Liu, Chaojie; La Trobe University, School of Psychology and Public Health<br>zhang, xin; harbin medical university, school of Health Management<br>Fu, Wenqi; Harbin Medical University, School of Health Management<br>Shi, Limei; Harbin Medical University, School of Health Management<br>Liu, Guoxiang; Harbin Medical University, School of Health Management |
| <b>Primary Subject Heading</b>: | Health economics                                                                                                                                                                                                                                                                                                                                                                                                                                                                                                                                                                           |
| Secondary Subject Heading:      | Health economics                                                                                                                                                                                                                                                                                                                                                                                                                                                                                                                                                                           |
| Keywords:                       | Health-Related Quality of Life, Colorectal Cancer, EQ-5D-5L                                                                                                                                                                                                                                                                                                                                                                                                                                                                                                                                |
|                                 |                                                                                                                                                                                                                                                                                                                                                                                                                                                                                                                                                                                            |

SCHOLARONE™  
Manuscripts

Only

1                   **Assessing health-related quality of life of patients with colorectal cancer using**  
2                   **EQ-5D-5L: a cross-sectional study in Heilongjiang of China**

3                   Weidong Huang<sup>1§</sup>, Jinjin Yang<sup>1§</sup>, Yang Liu<sup>1</sup>, Chaojie Liu<sup>2</sup>, Xin Zhang<sup>1</sup>, Wenqi Fu<sup>1</sup>,  
4                   Linmei Shi<sup>1</sup>, Guoxiang Liu<sup>1\*</sup>

5                   <sup>1</sup>School of Health Management, Harbin Medical University, 157 Baojian Road,  
6                   Nangang District, Harbin 150086, China.

7                   <sup>2</sup>School of Psychology and Public Health, La Trobe University, Melbourne VIC 3086,  
8                   Australia.

9                   Huang, Weidong; [weidong218@126.com](mailto:weidong218@126.com); Harbin Medical University, School of  
10                  Health Management

11                 Yang, Jinjin; [hrbmuyjj@126.com](mailto:hrbmuyjj@126.com); Harbin Medical University, School of Health  
12                  Management

13                 Liu, Yang; [liuyangly1989@163.com](mailto:liuyangly1989@163.com); Harbin Medical University, School of Health  
14                  Management

15                 Liu, Chaojie; [c.liu@latrobe.edu.au](mailto:c.liu@latrobe.edu.au); La Trobe University, School of Psychology and  
16                  Public Health

17                 Zhang, Xin; [zhangxinzhx0801@126.com](mailto:zhangxinzhx0801@126.com); Harbin Medical University, School of  
18                  Health Management

19                 Fu, Wenqi; [fuwenqi6688@163.com](mailto:fuwenqi6688@163.com); Harbin Medical University, School of Health  
20                  Management

21                 Shi, Linmei; [slm\\_jl@163.com](mailto:slm_jl@163.com); Harbin Medical University, School of Health  
22                  Management

23                 Liu, Guoxiang; [lgx6301@163.com](mailto:lgx6301@163.com); Harbin Medical University, School of Health  
24                  Management

25                 <sup>§</sup>These authors made equal contributions.

26                 \* Authors to whom correspondence should be addressed – Guoxiang Liu, E-mail:  
27                 [lgx6301@163.com](mailto:lgx6301@163.com), Tel: 86-451-87502863.

28                 The work was carried out in the School of Health Management, Harbin Medical  
29                 University, 157 Baojian Road, Nangang District, Harbin 150086, China.

30

1  
2  
3 **Abstract**

4 **Aim** This study aimed to assess the health-related quality of life (HRQoL) of patients  
5 with colorectal cancer (CRC) and its determinants.  
6

7 **Methods** A cross-sectional questionnaire survey was conducted on 300 newly  
8 diagnosed CRC patients in China's Heilongjiang province, measuring HRQoL using  
9 the EQ-5D-5L. Kruskal-Wallis analyses were performed to identify the independent  
10 variables associated with the EQ-5D-5L utility scores. Predictors of the utility scores  
11 were confirmed using a Tobit regression model.  
12

13 **Results** The respondents had a mean EQ-5D-5L utility score of 0.617 (SD=0.371) and  
14 a median of 0.740 (range: -0.348 to 1.000). Pain/discomfort and anxiety/depression  
15 were major complaints of the respondents, with a prevalence of over 60% (all levels  
16 inclusive). The Kruskal-Wallis analyses found lower utility scores in those who were  
17 not married, worked as a farmer, enrolled with the new rural cooperative medical  
18 scheme, and had lower household income ( $p<0.05$ ). Those who were at a later stage  
19 of CRC, underwent surgical only therapy, and had a stoma also had lower EQ-5D-5L  
20 scores than others ( $p<0.05$ ). The Tobit regression model confirmed these predictors,  
21 except for occupation and marital status.  
22

23 **Conclusion** CRC patients have poor HRQoL, with pain/discomfort and  
24 depression/anxiety as the most frequently reported problems. The poor HRQoL is  
25 associated with the seriousness of the disease condition, as well as the low  
26 socio-economic status of the patients.  
27

28 **Keywords:** Health-Related Quality of Life; Colorectal Cancer; EQ-5D-5L  
29  
30  
31  
32  
33  
34  
35  
36  
37  
38  
39  
40  
41  
42  
43  
44  
45  
46  
47  
48  
49  
50  
51  
52  
53  
54  
55  
56  
57  
58  
59  
60



## 1       **Strengths and limitations of this study**

2       **I** This study estimated EQ-5D-5L utility scores for patients with colorectal cancer  
3       (CRC), which can be used for health economic evaluations.

4       **II** Tobit regression model was established to determine the predictors of the utility  
5       scores derived from the censored data.

6       **III** The cross-sectional design prevented us from drawing causal conclusions.

7       □ The study was conducted in three tertiary hospitals in one province, which may  
8       limit the generalisability of its findings.

9       □ The sample was likely to bias toward more advanced cancer patients.

10

11

12

13

14

15

16

17

18

19

20

21

22

## 1 Introduction

2 Colorectal cancer (CRC) is one of the most common cancers in the world: the third in  
3 prevalence (after lung and breast cancer) and the fourth in mortality (after lung, liver  
4 and gastric cancer). It was estimated that 746,298 new cases of CRC were diagnosed  
5 in 2012 and 693,881 patients died from CRC worldwide [1]. A higher incidence of  
6 CRC was found in developed nations (29.2 per 100,000 inhabitants in Europe,  
7 Northern America, Australia, New Zealand and Japan) compared with their less  
8 developed counterparts (11.7 per 100,000 inhabitants in Africa, Asia (excluding  
9 Japan), Latin America and the Caribbean, Melanesia, Micronesia and Polynesia) [2].  
10 However, China has a level of CRC incidence almost on par with the developed  
11 nations, with 376,300 new cases being diagnosed alone in 2015 (27.4 per 100,000  
12 inhabitants). Most CRC patients live in China [3]. CRC has become the fifth leading  
13 cause of cancer death in China (around 191,000 CRC patients died in 2015: 13.9 per  
14 100,000 inhabitants) [3].

15 HRQoL is a patient-reported outcome, which has been increasingly used to  
16 support clinical and public health decisions [4]. Assessing patient-reported outcomes  
17 is particularly important for cancer research because of the complexities of cancer  
18 events and cancer treatment. Cancer treatment is often very expensive with limited  
19 prospects of remission. Patient-reported outcomes present an alternative option of  
20 evidence for decision making [5, 6].

21 However, the application of patient-reported outcomes has been compounded by  
22 its subjective nature. People's preferences need to be considered in quantifying and  
23 interpreting the results of patient-reported outcomes. Some researchers argue that  
24 people with different experiences (such as those with and without cancer) may have  
25 different preferences in relation to the same health state [7]. Nevertheless, the use of  
26 public preference to assess patient-reported outcomes has prevailed in health  
27 economic studies. This approach simplifies the preference scoring algorithm and  
28 justifies decisions from the perspective of a more representative population.

1  
2  
3 1 Several HRQoL instruments are available with a scoring system based on public  
4 preference, such as the EuroQol five-dimension (EQ-5D) [8], the Health Utilities  
5 Index (HUI)[9], and the Short-Form Six-Dimension (SF-6D) survey [10]. Their  
6 scoring algorithms are all anchored on 1.0 (full health) and 0 (death), with a negative  
7 score representing a health state worse than death.  
8  
9  
10  
11  
12

13 6 The EQ-5D is perhaps the most widely used instrument for assessing HRQoL  
14 based on public preference. It has been recommended by many researchers and  
15 governmental agencies [11]. Extensive studies have been undertaken using the  
16 EQ-5D-3L for assessing HRQoL [12-16] because a scoring algorithm based on the  
17 preference of the general public is available in many countries, such as Finland [12],  
18 Turkey [13], the UK [14], and the Netherlands [16]. These include some studies on  
19 CRC patients [12-18]. Although a few studies have been conducted in China  
20 investigating the HRQoL of CRC patients [19], most have failed to generate a  
21 preference-based score simply because of the absence of a scoring algorithm.  
22  
23  
24  
25  
26  
27  
28  
29  
30

31 15 The EQ-5D-5L was developed based on its predecessor EQ-5D-3L. It expanded  
32 the number of combined health states and is therefore believed to be more sensitive  
33 for detecting clinically important differences in HRQoL [20]. Recently, a scoring  
34 algorithm for the EQ-5D-5L was developed from a representative sample of the adult  
35 general population in China [21]. This study used the EQ-5D-5L to assess the HRQoL  
36 of CRC patients.  
37  
38  
39  
40  
41  
42

## 43 21 **Methods**

### 44 22 **Study subjects and data collection**

45 23 A cross-sectional questionnaire survey was conducted in Heilongjiang province,  
46 northeastern China, a province with a population of about 38 million. Heilongjiang  
47 ranks in the middle range in China in terms of its socioeconomic development, with  
48 \$6,386 per capita GDP in 2015 [22].  
49  
50  
51  
52  
53

54 27 Three major centers for cancer treatment, located in the capital city of  
55 Heilongjiang province, participated in the study. They were affiliated to a medical  
56  
57  
58  
59  
60

1 university and provided specialist care to cancer patients across the entire province.

2 Data were collected between December 2016 and April 2017. The newly  
3 diagnosed CRC patients who received treatment in the three centers over the period  
4 were invited to enroll in this study. The participants had to have a confirmed diagnosis  
5 of primary CRC; have not received any treatment from other hospitals; be able to read,  
6 write, and speak in Chinese; and be able to give informed consent. Those who were  
7 deemed incapable of completing the questionnaire due to physical or psychological  
8 difficulties were excluded from the study.

9 The survey was conducted while the participants stayed in the hospitals. A list of  
10 eligible participants was provided by the hospitals. But the survey was administered  
11 by trained interviewers, who had no servicing relationship with the patients. The  
12 interviewers were recruited from research students in a medical university.

13 Eight trained interviewers approached the eligible participants and explained the  
14 purpose of this study. Written informed consent was obtained prior to the survey. The  
15 questionnaires were completed through face-to-face interviews in a private office,  
16 unless the participants requested an interview in the ward. Respondents were  
17 encouraged to complete the questionnaire independently, with assistance from the  
18 interviewers being made available if requested. The interviewers collected and  
19 reviewed the questionnaires immediately once they were returned. The results will be  
20 fed back to the patient and asked him/her to complete missing items if needed.

21 A total of 346 eligible participants were confirmed by the interviewers. Of these  
22 eligible participants, 26 declined to participate (including 15 who were deemed  
23 incapable of completing the questionnaire due to physical and psychological  
24 difficulties); 10 were excluded because they were not made aware of their diagnoses;  
25 10 were excluded due to missing critical information in relation to the EQ-5D-5L data  
26 and socio-demographic and clinical characteristics of the respondents. This resulted in  
27 a final sample size of 300. On average, the respondents completed the survey 26 days  
28 after diagnosis (SD=15 days; range: 2 to 61 days).

### 29 **Patient and public involvement**

30 This study used an existing survey instrument. Patients were not involved in the  
31 recruitment to and conduct of the study. The utility scores were estimated based on

1 public preference and were not disseminated to the study participants. Publications of  
2 the results will be made open to the public. However, we are not able to disseminate  
3 the publications to the patient participants individually simply because we did not  
4 record the contact details of the patients.

5 The study protocol was reviewed and approved by the Research Ethics Committee,  
6 Public Health College of Harbin Medical University (Code: HMUIRB2014012).

## 7 **Measurement**

8 The survey consisted of the validated Chinese version of EQ-5D-5L, and the clinical  
9 features and socio-economic characteristics of the respondents.

### 10 **Dependent variable: EQ-5D-5L score**

11 The HRQoL of the respondents was assessed by the EQ-5D-5L, which has been  
12 validated in cancer patients [23]. It measures problems in five dimensions: mobility,  
13 self-care, usual activities, pain/discomfort, and anxiety/depression. Each dimension  
14 was rated along a five-level scale: no problem, slight problem, moderate problem,  
15 severe problem, and extreme problem [24]. Responses to the five dimensions  
16 generated 3125 ( $5^5$ ) combinations of HRQoL states, with “11111” indicating “no  
17 problems at all” and “55555” indicating “extreme problems” in all five dimensions.  
18 Each combination was then be given a single score using a scoring algorithm based on  
19 public preference. In health economics, this is usually called the “utility score”. In this  
20 study, we used the Chinese EQ-5D-5L value set [21] to estimate the utility score for  
21 each respondent, which ranged from -0.391 to 1.000.

### 22 **Independent variables**

23 Independent variables that might be associated with the HRQoL of CRC patients were  
24 determined with reference to several systematic reviews [25-27], including the  
25 clinical features and socio-economic characteristics of the respondents. Data on the  
26 clinical features of the respondents were collected through a review of medical  
27 records, which included the stage of CRC (I, II, III, IV), therapeutic regimen (surgery,  
28 radiotherapy/chemotherapy, surgery followed by postoperative chemotherapy,

1 chemotherapy followed by surgery), and the presence of a stoma (yes or no). The  
2 socio-demographic characteristics of the respondents were collected through the  
3 questionnaire survey, which included gender, age, religion, ethnicity, education,  
4 marital status, occupation, medical insurance, and household income.

## 5 **Statistical analysis**

6 The EQ-5D-5L utility scores of respondents followed a non-normal distribution  
7 (Kolmogorov-Smirnov test,  $p < 0.05$ ). We presented both mean (standard deviation, SD)  
8 and median (range) scores and applied Kruskal-Wallis analyses to determine the  
9 differences in the utility scores of the respondents with different characteristics.

10 We then established a Tobit regression model on the EQ-5D-5L utility scores,  
11 including all of the independent variables that showed statistical significance ( $p < 0.05$ )  
12 in the Kruskal-Wallis analyses. The ceiling effect is common in HRQoL studies, in  
13 which a significant number of respondents report the highest score [28-30]. This is  
14 particularly evident with the EQ-5D instruments [30, 31], leading to some utility  
15 scores censored at 1.0. In this study, 16.7% of respondents scored the highest possible  
16 score 1.0. A general linear regression model is inappropriate for censored data because  
17 the values do not necessarily represent the exact values once they reach the censored  
18 threshold. For censored data, the Tobit regression model is advised [28-30, 32, 33].

19 All statistical analyses were conducted using the SPSS version 18 and the  
20 STATA version 12.0. A  $p$  value of less than 0.05 was considered an indication of  
21 statistical significance.

## 22 **Results**

23 The respondents had a mean age of 59 years (ranging from 28 years to 84 years). The  
24 majority was men (65%), married (90%), ethnic Han (96%), and had no religious  
25 belief (94%). About 17% of the respondents had obtained a university degree. All of  
26 the respondents were covered by social health insurance, albeit across three different  
27 schemes. Their household income was higher compared with the average level

1 (¥27,830) in Heilongjiang. About half of the respondents were still in the paid  
2 workforce at the time of the survey. More than half (54%) of respondents had  
3 received surgical treatment, but only 16.33% had a stoma. Most patients were at stage  
4 II (37.0%) and stage III (38.0%) of CRC (Table 1).

5 Problems in pain/discomfort were most frequently reported (60%, all levels  
6 inclusive), followed by anxiety/depression (59%, all levels inclusive), usual activities  
7 (53%, all levels inclusive), self-care (49%, all levels inclusive), and mobility (46%, all  
8 levels inclusive). About 16.7% of respondents reported no problems at all in all five  
9 dimensions (Table 2).

10 The respondents had an average utility score of 0.617 and a median of 0.740  
11 (Table 3). The distribution of the EQ-5D-5L utility scores skewed toward the right  
12 higher values (Figure 1). No significant differences in the utility scores were found in  
13 those of a different age, gender, ethnicity, religious belief, and level of education  
14 ( $p>0.10$ ). The Kruskal-Wallis analyses found lower EQ-5D-5L utility scores in those  
15 who were not married, worked as a farmer, enrolled with the new rural cooperative  
16 medical scheme, and had lower income ( $p<0.05$ ). The EQ-5D-5L utility scores also  
17 varied with clinical characteristics. Those who were at a later stage of CRC, had  
18 undergone surgical treatment only, and had a stoma had lower utility scores compared  
19 with the others ( $p<0.05$ ).

20 The Tobit regression model confirmed that low household income, membership  
21 of the new rural cooperative medical scheme, a later stage of CRC, surgical only  
22 therapy, and the presence of a stoma were significant predictors of low EQ-5D-5L  
23 utility scores. However, occupation and marital status became statistically  
24 insignificant in predicting utility scores after controlling for other factors (Table 4).

## 25 Discussion

26 This study presents the utility scores for newly diagnosed CRC patients measured by  
27 the EQ-5D-5L. To the best of our knowledge, this is the first study of its kind in China.

1  
2  
3 1 The results can be used for health economic evaluations of clinical and public health  
4 interventions on CRC. Previous attempts on cost-utility analyses of CRC  
5 interventions have been deterred by the lack of such utility scores [5]. The findings of  
6 this study provide baseline health utility values for CRC patients, which can be used  
7 by researchers in calculating quality-adjusted life years, an indicator essential for  
8 health economic evaluations, including cost-utility analyses. The study also revealed  
9 clinical and socio-economic factors associated with the utility scores of CRC patients,  
10 which can help clinical and policy decision makers to better allocate resources.  
11  
12  
13  
14  
15  
16  
17  
18

19 This study found that CRC patients live with significantly lower HRQoL than the  
20 local general public as measured by the EQ-5D utility scores (0.617 vs. 0.959) [30].  
21 This finding is consistent with previous studies [12, 14, 18]. The CRC respondents of  
22 our study also appear to have lower utility scores than those from Finland (0.813) [12]  
23 Japan (0.842-0.865) [34, 35] and the UK (0.79) [15]. However, the interpretation of  
24 such differences needs to be cautious because the utility scores of the local general  
25 population in China and those in Finland, Japan and the UK were derived from the  
26 EQ-5D-3L. Empirical evidence shows that the EQ-5D-5L has a lower ceiling effect  
27 and higher discriminatory power than the EQ-5D-3L [12, 15, 23, 30]. In addition, the  
28 clinical and socio-economic characteristics of our CRC patients may also differ from  
29 those of other studies. Our sample was drawn from three tertiary hospitals and these  
30 patients tend to have more advanced diseases [36]. This study captured the utility  
31 scores of CRC patients soon after their diagnoses (26 days on average), much earlier  
32 than those of the studies in Finland (6-8 months) [12], Turkey (6 months after  
33 chemotherapy) [13], and England (12-36 months) [14].  
34  
35  
36  
37  
38  
39  
40  
41  
42  
43  
44  
45  
46

47 We found that pain/discomfort is the most frequently reported problem (60%, all  
48 levels inclusive) of respondents, similar to that reported by CRC patients in the  
49 Netherlands and the UK [16]. This study also revealed that 59% of CRC patients  
50 experienced anxiety/depression. Indeed, anxiety/depression is perhaps the most  
51 common psychological problem among all cancer patients [37, 38]. Further efforts  
52 should be made to improve the management of pain/discomfort and  
53  
54  
55  
56  
57  
58  
59  
60



1 anxiety/depression.

2       There is some debate about the association between HRQoL and the stage of  
3 CRC. We found a decreasing trend in HRQoL with the progress of CRC, consistent  
4 with those reported in Australia and some European countries [26, 39-41]. However  
5 Hornbrook and colleagues reported worse HRQoL in patients with stage II CRC  
6 compared with those in stage III and IV [18].

7       CRC patients undergoing surgical procedures often have lower HRQoL [26, 42].  
8 Our study provides additional evidence for this conclusion. It is widely accepted that  
9 surgical procedures are usually associated with increased pain/discomfort,  
10 complications, and inconvenience in daily activities. However, it is not clear why  
11 surgery in combination with other treatment measures can produce a higher utility  
12 score than surgery alone. The presence of a stoma is a clear indication of poor  
13 HRQoL. A HRQoL instrument (mCOH-QOL-Ostomy) has been developed  
14 specifically for CRC patients with a stoma [43].

15       Low socio-economic status is a significant predictor of low HRQoL in CRC  
16 patients. In this study, household income and social health insurance entitlements  
17 were found to be associated with the HRQoL of CRC patients, consistent with  
18 findings of previous studies conducted in China [19] and some other countries [39,  
19 40]. Medical treatment for CRC is very expensive. A survey of 37 tertiary hospitals in  
20 13 provinces in China revealed a high level of catastrophic expenditure for CRC  
21 patients [44]. This is a particular concern for those living with low income and those  
22 with limited insurance entitlements. Although China has achieved universal health  
23 insurance coverage, considerable disparities exist in terms of entitlements across the  
24 three government subsidized basic health insurance programs covering rural residents,  
25 urban residents and urban employees, respectively [45]. Rural patients in China are  
26 not only more likely to have lower household income, but also are least protected by  
27 their health insurance coverage. The new rural cooperative medical scheme (NRCMS),  
28 launched in 2003, is characterized by voluntary enrollment, low premium contribution

1 (about US\$20 per person in 2016), and fixed governmental subsidies (about US\$60  
2 per person in 2016). These led to high population coverage of insurance at the cost of  
3 limited benefits. The rural insured usually bear a higher proportion of out-of-pocket  
4 expenses than their urban counterparts.

5 This study has several limitations. As a cross-sectional survey, no causal  
6 relationships can be assumed. The study was conducted in three tertiary hospitals in  
7 one province, which is not a representative sample of China; hence, generalization of  
8 the results needs to be cautious. It is also important to note that the sample was drawn  
9 from hospital settings and was biased toward more advanced cancer patients [46].

10 In conclusion, this study presents utility scores for CRC patients measured by the  
11 EQ-5D-5L. CRC patients have poor HRQoL, with pain/discomfort and  
12 depression/anxiety as the most frequently reported problems. The low HRQoL of  
13 CRC patients is associated with more advanced stages of CRC, the presence of a  
14 stoma and surgery only treatment. But low socio-economic status, such as low levels  
15 of income and insurance entitlements, is also a predictor of low HRQoL.

### 16 **Ethical Statements and consent to participate**

17 This study was approved by the Ethics Committee of Harbin Medical University  
18 (Project Identification Code: HMUIRB2014012). All procedures performed in this  
19 study were in accordance with the ethical standards of the institutional research  
20 committee and with the 1964 Helsinki declaration and its later amendments or  
21 comparable ethical standards. Informed consent was obtained from all individual  
22 participants in the study.

### 23 **Acknowledgements**

24 The authors are most grateful to the study participants.

### 25 **Funding**

26 This study was funded by the National Natural Scientific Foundation of China (Grant  
27 No.71503062, 71673071), the Heilongjiang Postdoctoral Fund (Grant No.  
28 LBH-Z16137, LBH-Z16240), the China Postdoctoral Fund (Grant No.

1  
2  
3 1 2017M611402), the Key Lab of Health Technology Assessment, National Health and  
4 Family Planning Commission of China (Fudan University) (Grant No.  
5 FHTA2017-08).  
6  
7

#### 8 **Authors' Contributions**

9  
10 JY participated in the design of the study and the writing of the manuscript. WH  
11 designed the study, performed the statistical analyses and drafted the manuscript. GL  
12 and CL supervised and interpreted the statistical findings and wrote the manuscript.  
13  
14 YL helped draft the manuscript. WF, LS and XZ conceived the study and participated  
15 in the design. All authors read and approved the final manuscript.  
16  
17  
18

#### 19 **Competing interests**

20  
21 None declared  
22  
23

#### 24 **Data sharing statement**

25  
26 Data are available from the corresponding author on request.  
27  
28

#### 29 **Reference**

- 30  
31 1. Ferlay J SI, Ervik M, Dikshit R, Eser S, Mathers C, Rebelo M, Parkin DM, Forman D, Bray, F.  
32 GLOBOCAN 2012 v1.1, Cancer Incidence and Mortality Worldwide: IARC CancerBase No. 11.  
33 2014  
34  
35 2. Kuipers EJ. Colorectal cancer. *Nature Reviews Disease Primers* 2015; **1**: 15065.  
36  
37 3. Chen W, Zheng R, Baade PD, Zhang S, Zeng H, Bray F, et al. Cancer statistics in China, 2015. *CA:  
38 a cancer journal for clinicians* 2016; **66**: 115-32.  
39  
40 4. Ravens-Sieberer U. Measuring and monitoring quality-of-life in population surveys: Still a  
41 challenge for public health research. *Sozial- und Präventivmedizin* 2002; **47**: 203-4.  
42  
43 5. Huang W, Liu G, Zhang X, Fu W, Zheng S, Wu Q, et al. Cost-effectiveness of colorectal cancer  
44 screening protocols in urban Chinese populations. *PloS one* 2014; **9**: e109150.  
45  
46 6. Drummond MF SM, Torrance GW, O'Brien B, Stoddart GL. (2005 3rd ed edition) *Methods for  
47 the Economic Evaluation of Health Care Programmes*. Oxford University Press, New York.  
48  
49 7. Greenberg D, Earle C, Fang CH, Eldar-Lissai A, Neumann PJ. When is cancer care cost-effective?  
50 A systematic overview of cost-utility analyses in oncology. *Value in Health* 2010; **102**: 82.  
51  
52 8. Brooks R. EuroQol: the current state of play. *Health Policy* 1996; **37**: 53.  
53  
54 9. Feeny DD, Furlong W, Boyle M, Torrance GW. Multi-Attribute Health Status Classification  
55 Systems. *PharmacoEconomics* 1995; **7**: 490-502.  
56  
57 10. Kharroubi SA, Brazier JE, Roberts J, O'Hagan A. Modelling SF-6D health state preference data  
58 using a nonparametric Bayesian method. *Journal of Health Economics* 2007; **26**: 597-612.  
59  
60 11. Räsänen P, Roine E, Sintonen H, Semberg-Konttinen V, Ryyänen OP, Roine R. Use of  
quality-adjusted life years for the estimation of effectiveness of health care: A systematic

- 1 literature review. *International Journal of Technology Assessment in Health Care* 2006; **22**:  
2 235.
- 3 12. Farkkila N, Sintonen H, Saarto T, Jarvinen H, Hanninen J, Taari K, et al. Health-related quality  
4 of life in colorectal cancer. *Colorectal disease : the official journal of the Association of*  
5 *Coloproctology of Great Britain and Ireland* 2013; **15**: e215-22.
- 6 13. Polat U, Arpaci A, Demir S, Erdal S, Yalcin S. Evaluation of quality of life and anxiety and  
7 depression levels in patients receiving chemotherapy for colorectal cancer: impact of patient  
8 education before treatment initiation. *Journal of gastrointestinal oncology* 2014; **5**: 270-5.
- 9 14. Downing A, Morris EJ, Richards M, Corner J, Wright P, Sebag-Montefiore D, et al.  
10 Health-related quality of life after colorectal cancer in England: a patient-reported outcomes  
11 study of individuals 12 to 36 months after diagnosis. *Journal of clinical oncology : official*  
12 *journal of the American Society of Clinical Oncology* 2015; **33**: 616-24.
- 13 15. Wilson TR, Alexander DJ, Kind P. Measurement of health-related quality of life in the early  
14 follow-up of colon and rectal cancer. *Diseases of the colon and rectum* 2006; **49**: 1692-702.
- 15 16. Stein D, Joulain F, Naoshy S, Iqbal U, Muszbek N, Payne KA, et al. Assessing health-state utility  
16 values in patients with metastatic colorectal cancer: a utility study in the United Kingdom and  
17 the Netherlands. *International journal of colorectal disease* 2014; **29**: 1203-10.
- 18 17. Hornbrook MC, Wendel CS, Coons SJ, Grant M, Herrinton LJ, Mohler MJ, et al. Complications  
19 Among Colorectal Cancer Survivors. *Medical Care* 2011; **49**: 321-6.
- 20 18. Wong CK, Lam CL, Poon JT, Kwong DL. Clinical correlates of health preference and generic  
21 health-related quality of life in patients with colorectal neoplasms. *PLoS one* 2013; **8**: e58341.
- 22 19. Wang JW, Sun L, Ding N, Li J, Gong XH, Chen XF, et al. The association between comorbidities  
23 and the quality of life among colorectal cancer survivors in the People's Republic of China.  
24 *Patient preference and adherence* 2016; **10**: 1071-7.
- 25 20. Herdman M, Gudex C, Lloyd A, Janssen M, Kind P, Parkin D, et al. Development and  
26 preliminary testing of the new five-level version of EQ-5D (EQ-5D-5L). *Quality of Life Research*  
27 *An International Journal of Quality of Life Aspects of Treatment Care & Rehabilitation* 2011;  
28 **20**: 1727.
- 29 21. Luo N, Liu G, Li M, Guan H, Jin X, Randhendriksen K. Estimating an EQ-5D-5L Value Set for  
30 China. *Value in Health* 2017; **20**: 662-9.
- 31 22. Statistics HPBo. (2015) *Heilongjiang Statistical Yearbook*. China Statistics Press, Peking.
- 32 23. Kim SH, Kim HJ, Lee SI, Jo MW. Comparing the psychometric properties of the EQ-5D-3L and  
33 EQ-5D-5L in cancer patients in Korea. *Quality of Life Research An International Journal of*  
34 *Quality of Life Aspects of Treatment Care & Rehabilitation* 2012; **21**: 1065-73.
- 35 24. Group EQC. EuroQol--a new facility for the measurement of health-related quality of life.  
36 *Health Policy* 1990; **16**: 199-208.
- 37 25. Bours MJ, Bw VDL, Winkels RM, van Duijnhoven FJ, Mols F, van Roekel EH, et al. Candidate  
38 Predictors of Health-Related Quality of Life of Colorectal Cancer Survivors: A Systematic  
39 Review. *Oncologist* 2016; **21**
- 40 26. Der BWAL, Van. Predictors of health-related quality of life of colorectal cancer survivors: a  
41 systematic literature review. 2016
- 42 27. Hu X, Gong Y, Wang C, Zhang Y, Feng X. The quality of life for patient with colorectal neoplasm  
43 and its influential factors. *Tumor* 2003: 343-5.
- 44 28. Sullivan PW, Ghushchyan VH. EQ-5D Scores for Diabetes-Related Comorbidities. *Value in*

- 1  
2  
3 1 *health : the journal of the International Society for Pharmacoeconomics and Outcomes*  
4 2 *Research* 2016; **19**: 1002-8.
- 5 3 29. Sullivan PW, Ghushchyan VH, Globe G, Sucher B. Health-related quality of life associated with  
6 4 systemic corticosteroids. *Quality of life research : an international journal of quality of life*  
7 5 *aspects of treatment, care and rehabilitation* 2017; **26**: 1037-58.
- 8 6 30. Huang W, Yu H, Liu C, Liu G, Wu Q, Zhou J, et al. Assessing Health-Related Quality of Life of  
9 7 Chinese Adults in Heilongjiang Using EQ-5D-3L. *International Journal of Environmental*  
10 8 *Research & Public Health* 2017; **14**
- 11 9 31. Bharmal M, Rd TJ. Comparing the EQ-5D and the SF-6D descriptive systems to assess their  
12 10 ceiling effects in the US general population. *Value in Health the Journal of the International*  
13 11 *Society for Pharmacoeconomics & Outcomes Research* 2006; **9**: 262.
- 14 12 32. Twisk J, Rijmen F. Longitudinal tobit regression: a new approach to analyze outcome variables  
15 13 with floor or ceiling effects. *Journal of Clinical Epidemiology* 2009; **62**: 953-8.
- 16 14 33. Tran BX, Ohinmaa A, Long TN. Quality of life profile and psychometric properties of the  
17 15 EQ-5D-5L in HIV/AIDS patients. *Health & Quality of Life Outcomes* 2012; **10**: 132.
- 18 16 34. HAMASHIMA, CHISATO. Long-term quality of life of postoperative rectal cancer patients.  
19 17 *Journal of Gastroenterology & Hepatology* 2002; **17**: 571-6.
- 20 18 35. Kameyama H, Shimada Y, Yagi R, Yamada S, Hotta S, Tajima Y, et al. Quality of Life of Patients  
21 19 after Colorectal Cancer Surgery as Assessed Using EQ-5D-5L Scores. *Gan to Kagaku Ryoho*  
22 20 *Cancer & Chemotherapy* 2017; **44**: 1083-5.
- 23 21 36. Gao K, Gan X. Medical Units Distribution and Influence Factors on the Selection of Patients.  
24 22 *Chinese Health Service Management* 2014; **31**: 516-7.
- 25 23 37. Strong V, Waters R, Hibberd C, Rush R, Cargill A, Storey D, et al. Emotional distress in cancer  
26 24 patients: the Edinburgh Cancer Centre symptom study. *British journal of cancer* 2007; **96**:  
27 25 868.
- 28 26 38. Soa WKW, Ling WM, Leung FY, Lo JCK, Yeung M, Li GKH. Anxiety, depression and quality of life  
29 27 among Chinese breast cancer patients during adjuvant therapy. *European Journal of*  
30 28 *Oncology Nursing* 2010; **14**: 17-22.
- 31 29 39. Paika V, Creed F, Kampletsas EO, Sifaka V, Gkika S, Mavreas V, et al. Personality variables are  
32 30 associated with colorectal cancer patients' quality of life independent of psychological  
33 31 distress and disease severity. *Psychooncology* 2010; **19**: 273-82.
- 34 32 40. Sharma A, Sharp DM, Walker LG, Monson JRT. Predictors of Early Postoperative Quality of Life  
35 33 after Elective Resection for Colorectal Cancer. *Annals of Surgical Oncology* 2007; **14**: 3435-42.
- 36 34 41. Rinaldis M, Pakenham KI, Lynch BM. Relationships between quality of life and finding benefits  
37 35 in a diagnosis of colorectal cancer. *British Journal of Psychology* 2010; **101**: 259.
- 38 36 42. Chambers SK, Meng X, Youl P, Aitken J, Dunn J, Baade P. A five-year prospective study of  
39 37 quality of life after colorectal cancer. *Quality of life research : an international journal of*  
40 38 *quality of life aspects of treatment, care and rehabilitation* 2012; **21**: 1551-64.
- 41 39 43. Liu L, Herrinton LJ, Hornbrook MC, Wendel CS, Grant M, Krouse RS. Early and late  
42 40 complications among long-term colorectal cancer survivors with ostomy or anastomosis.  
43 41 *Diseases of the colon and rectum* 2010; **53**: 200-12.
- 44 42 44. Huang HY, Shi JF, Guo LW, Zhu XY, Wang L, Liao XZ, et al. Expenditure and financial burden for  
45 43 common cancers in China: a hospital-based multicentre cross-sectional study. *Lancet* 2016;  
46 44 **388**: S10-S.

- 1  
2  
3 1 45. Dong K. Medical insurance system evolution in China ☆. *China Economic Review* 2009; **20**:  
4 2 591-7.  
5 3 46. Yang SM, Li JY, Gale RP, Huang XJ. The mystery of chronic lymphocytic leukemia (CLL): Why is  
6 4 it absent in Asians and what does this tell us about etiology, pathogenesis and biology? *Blood*  
7 5 *Reviews* 2015; **29**: 205-13.  
8 6  
9  
10  
11  
12  
13  
14  
15  
16  
17  
18  
19  
20  
21  
22  
23  
24  
25  
26  
27  
28  
29  
30  
31  
32  
33  
34  
35  
36  
37  
38  
39  
40  
41  
42  
43  
44  
45  
46  
47  
48  
49  
50  
51  
52  
53  
54  
55  
56  
57  
58  
59  
60

1  
2  
3  
4  
5  
6  
7  
8  
9  
10  
11  
12  
13  
14  
15  
16  
17  
18  
19  
20  
21  
22  
23  
24  
25  
26  
27  
28  
29  
30  
31  
32  
33  
34  
35  
36  
37  
38  
39  
40  
41  
42  
43  
44  
45  
46  
47  
48  
49  
50  
51  
52  
53  
54  
55  
56  
57  
58  
59  
60

**Figure legends**

**Figure 1.** Distribution of the EQ-5D-5L utility scores of CRC patients

For peer review only

**Table 1** Socio-demographic and clinical characteristics of respondents

| Characteristic                                 | N          | %          |
|------------------------------------------------|------------|------------|
| <b>Sex</b>                                     |            |            |
| Male                                           | 195        | 65.00      |
| Female                                         | 105        | 35.00      |
| <b>Age (years)</b>                             |            |            |
| ≤ 40                                           | 50         | 16.67      |
| 50-59                                          | 92         | 30.67      |
| 60-69                                          | 105        | 35.00      |
| ≥ 70                                           | 53         | 17.66      |
| <b>Religious belief</b>                        |            |            |
| Yes                                            | 18         | 6.00       |
| No                                             | 282        | 94.00      |
| <b>Ethnicity</b>                               |            |            |
| Han                                            | 288        | 96.00      |
| Other                                          | 12         | 4.00       |
| <b>Level of education</b>                      |            |            |
| Primary school or below                        | 64         | 21.33      |
| Junior high school                             | 103        | 34.34      |
| Senior high school                             | 82         | 27.33      |
| University                                     | 51         | 17.00      |
| <b>Marital status</b>                          |            |            |
| Married                                        | 270        | 90.00      |
| Other                                          | 30         | 10.00      |
| <b>Occupation</b>                              |            |            |
| Public sector employee                         | 38         | 12.67      |
| Private sector employee                        | 36         | 12.00      |
| Self-employed or unemployed                    | 55         | 18.33      |
| Farmer                                         | 63         | 21.00      |
| Retired                                        | 108        | 36.00      |
| <b>Health insurance</b>                        |            |            |
| Basic medical insurance for urban employees    | 154        | 51.33      |
| Basic medical insurance for urban residents    | 62         | 20.67      |
| New rural cooperative medical scheme           | 84         | 28.00      |
| <b>Annual household income (Yuan)</b>          |            |            |
| <20000                                         | 56         | 18.67      |
| 20000–39999                                    | 84         | 28.00      |
| 40000-59999                                    | 72         | 24.00      |
| 60000-79999                                    | 39         | 13.00      |
| >80000                                         | 49         | 16.33      |
| <b>Therapeutic regimen</b>                     |            |            |
| Surgery                                        | 163        | 54.33      |
| Radiotherapy/chemotherapy                      | 44         | 14.67      |
| Surgery followed by postoperative chemotherapy | 51         | 17.00      |
| Chemotherapy followed by surgery               | 18         | 6.00       |
| Other                                          | 24         | 8.00       |
| <b>Stage of CRC</b>                            |            |            |
| I                                              | 40         | 13.33      |
| II                                             | 111        | 37.00      |
| III                                            | 114        | 38.00      |
| IV                                             | 35         | 11.67      |
| <b>Stoma</b>                                   |            |            |
| Yes                                            | 49         | 16.33      |
| No                                             | 251        | 83.67      |
| <b>Total</b>                                   | <b>300</b> | <b>100</b> |



**Table 2** Problems reported by respondents in the five dimensions of EQ-5D-5L

| Problems | Mobility | Self-care | Usual Activity | Pain/Discomfort | Anxiety/Depression |
|----------|----------|-----------|----------------|-----------------|--------------------|
| No       | 53.7%    | 51.0%     | 46.7%          | 39.7%           | 40.7%              |
| Slight   | 14.3%    | 15.4%     | 18.3%          | 25.0%           | 23.3%              |
| Moderate | 11.3%    | 12.0%     | 13.3%          | 25.3%           | 24.3%              |
| Severe   | 10.0%    | 11.3%     | 12.0%          | 7.0%            | 9.3%               |
| Extreme  | 10.7%    | 10.3%     | 11.7%          | 3.0%            | 2.4%               |

For peer review only

**Table 3** EQ-5D-5L index scores in respondents with different characteristics

|                                                | N          | Mean±SD            | Median (range)             | P            |
|------------------------------------------------|------------|--------------------|----------------------------|--------------|
| <b>Sex</b>                                     |            |                    |                            | <b>0.942</b> |
| Male                                           | 195        | 0.614±0.378        | 0.731 (-0.348-1.00)        |              |
| Female                                         | 105        | 0.621±0.361        | 0.751 (-0.348-1.00)        |              |
| <b>Age</b>                                     |            |                    |                            | <b>0.330</b> |
| ≤49                                            | 50         | 0.561±0.398        | 0.670 (-0.348-1.00)        |              |
| 50-59                                          | 92         | 0.686±0.327        | 0.819 (-0.348-1.00)        |              |
| 60-69                                          | 105        | 0.592±0.373        | 0.687(-0.251-1.00)         |              |
| ≥70                                            | 53         | 0.598±0.407        | 0.782 (-0.265-1.00)        |              |
| <b>Religious belief</b>                        |            |                    |                            | <b>0.537</b> |
| Yes                                            | 18         | 0.612±0.375        | 0.740 (-0.348-1.00)        |              |
| No                                             | 282        | 0.683±0.302        | 0.772 (0.139-1.00)         |              |
| <b>Ethnicity</b>                               |            |                    |                            | <b>0.166</b> |
| Han                                            | 288        | 0.620±0.374        | 0.749 (-0.348-1.00)        |              |
| Other                                          | 12         | 0.541±0.307        | 0.618 (-0.044-0.89)        |              |
| <b>Level of education</b>                      |            |                    |                            | <b>0.180</b> |
| Primary school or below                        | 64         | 0.581±0.363        | 0.646 (-0.298-1.00)        |              |
| Junior high school                             | 103        | 0.583±0.376        | 0.661 (-0.348-1.00)        |              |
| Senior high school                             | 82         | 0.638±0.373        | 0.744 (-0.348-1.00)        |              |
| University                                     | 51         | 0.696±0.365        | 0.833 (-0.201-1.00)        |              |
| <b>Marital status</b>                          |            |                    |                            | <b>0.026</b> |
| Married                                        | 270        | 0.635±0.359        | 0.746 (-0.348-1.00)        |              |
| Other                                          | 30         | 0.452±0.445        | 0.455 (-0.348-0.95)        |              |
| <b>Occupation</b>                              |            |                    |                            | <b>0.007</b> |
| Public sector employee                         | 38         | 0.734±0.341        | 0.895 (-0.201-1.00)        |              |
| Private sector employee                        | 36         | 0.706±0.328        | 0.833 (-0.184-1.00)        |              |
| Self-employed or unemployed                    | 55         | 0.603±0.359        | 0.659 (-0.348-1.00)        |              |
| Farmer                                         | 63         | 0.500±0.411        | 0.600 (-0.348-1.00)        |              |
| Retired                                        | 108        | 0.621±0.326        | 0.756 (-0.201-1.00)        |              |
| <b>Health insurance</b>                        |            |                    |                            | <b>0.001</b> |
| Basic medical insurance for urban employees    | 154        | 0.674±0.352        | 0.825 (-0.251-1.00)        |              |
| Basic medical insurance for urban residents    | 62         | 0.645±0.354        | 0.720 (-0.348-1.00)        |              |
| New rural cooperative medical scheme           | 84         | 0.490±0.392        | 0.586 (-0.348-1.00)        |              |
| <b>Annual household income (Yuan)</b>          |            |                    |                            | <b>0.002</b> |
| <20000                                         | 56         | 0.505±0.419        | 0.586 (-0.348-1.00)        |              |
| 20000–39999                                    | 84         | 0.566±0.369        | 0.685 (-0.348-1.00)        |              |
| 40000-59999                                    | 72         | 0.625±0.375        | 0.763 (-0.251-1.00)        |              |
| 60000-79999                                    | 39         | 0.691±0.300        | 0.824 (-0.044-1.00)        |              |
| >80000                                         | 49         | 0.759±0.315        | 0.882 (-0.201-1.00)        |              |
| <b>Therapeutic regimen</b>                     |            |                    |                            | <b>0.000</b> |
| Surgery                                        | 163        | 0.517±0.389        | 0.600 (-0.348-1.00)        |              |
| Radiotherapy/chemotherapy                      | 44         | 0.757±0.271        | 0.830 (-0.071-1.00)        |              |
| Surgery followed by postoperative chemotherapy | 51         | 0.712±0.359        | 0.848 (-0.298-1.00)        |              |
| Chemotherapy followed by surgery               | 18         | 0.734±0.320        | 0.847 (-0.005-1.00)        |              |
| Other                                          | 24         | 0.748±0.274        | 0.854 (0.120-1.00)         |              |
| <b>Stage of disease</b>                        |            |                    |                            | <b>0.001</b> |
| I                                              | 40         | 0.768±0.296        | 0.893 (0.025-1.00)         |              |
| II                                             | 111        | 0.656±0.344        | 0.821 (-0.348-1.00)        |              |
| III                                            | 114        | 0.562±0.394        | 0.698 (-0.265-1.00)        |              |
| IV                                             | 35         | 0.495±0.395        | 0.637(-0.348-1.00)         |              |
| <b>Stoma</b>                                   |            |                    |                            | <b>0.000</b> |
| Yes                                            | 49         | 0.408±0.397        | 0.409 (-0.348-1.00)        |              |
| No                                             | 251        | 0.657±0.353        | 0.808 (-0.348-1.00)        |              |
| <b>Total</b>                                   | <b>300</b> | <b>0.617±0.371</b> | <b>0.740 (-0.348-1.00)</b> |              |

**Table 4.** Results of Tobit regression model on EQ-5D-5L index scores of respondents

| Variables                                                          | Regression Coefficient | 95% Confidence interval |        | P value  |
|--------------------------------------------------------------------|------------------------|-------------------------|--------|----------|
| <b>Marital status (Ref=other )</b>                                 |                        |                         |        |          |
| Married                                                            | 0.128                  | -0.010                  | 0.267  | 0.070    |
| <b>Occupation (Ref=Retired)</b>                                    |                        |                         |        |          |
| Public sector employee                                             | 0.069                  | -0.073                  | 0.210  | 0.340    |
| Private sector employee                                            | 0.073                  | -0.069                  | 0.215  | 0.313    |
| Self-employed or unemployed                                        | 0.011                  | -0.139                  | 0.163  | 0.879    |
| Farmer                                                             | 0.104                  | -0.080                  | 0.288  | 0.265    |
| <b>Health insurance (Ref=New rural cooperative medical scheme)</b> |                        |                         |        |          |
| Urban employees basic medical insurance                            | 0.126                  | -0.047                  | 0.299  | 0.152    |
| Urban residents basic medical insurance                            | 0.157                  | 0.001                   | 0.313  | 0.049*   |
| <b>Stage of disease (Ref=I)</b>                                    |                        |                         |        |          |
| II                                                                 | -0.203                 | -0.342                  | -0.065 | 0.004**  |
| III                                                                | -0.329                 | -0.468                  | -0.192 | 0.000*** |
| IV                                                                 | -0.626                 | -0.809                  | -0.444 | 0.000*** |
| <b>Annual household income(Ref=&gt;80000)</b>                      |                        |                         |        |          |
| <20000                                                             | -0.261                 | -0.422                  | -0.100 | 0.002**  |
| 20000–39999                                                        | -0.220                 | -0.358                  | -0.081 | 0.002**  |
| 40000-59999                                                        | -0.155                 | -0.294                  | -0.016 | 0.029*   |
| 60000-79999                                                        | -0.145                 | -0.306                  | 0.015  | 0.076    |
| <b>Therapeutic regimen(Ref=other)</b>                              |                        |                         |        |          |
| Surgery                                                            | -0.261                 | -0.423                  | -0.098 | 0.002**  |
| Radiotherapy/Chemotherapy                                          | 0.135                  | -0.057                  | 0.326  | 0.167    |
| Surgery followed by postoperative chemotherapy                     | 0.177                  | -0.166                  | 0.202  | 0.849    |
| Chemotherapy followed by surgery                                   | 0.053                  | -0.178                  | 0.284  | 0.653    |
| <b>Stoma (Ref=no)</b>                                              |                        |                         |        |          |
| Yes                                                                | -0.224                 | -0.337                  | -0.111 | 0.000*** |

Note: \*p < 0.05, \*\*p < 0.01, \*\*\*p < 0.001

1  
2  
3  
4  
5  
6  
7  
8  
9  
10  
11  
12  
13  
14  
15  
16  
17  
18  
19  
20  
21  
22  
23  
24  
25  
26  
27  
28  
29  
30  
31  
32  
33  
34  
35  
36  
37  
38  
39  
40  
41  
42  
43  
44  
45  
46  
47  
48  
49  
50  
51  
52  
53  
54  
55  
56  
57  
58  
59  
60

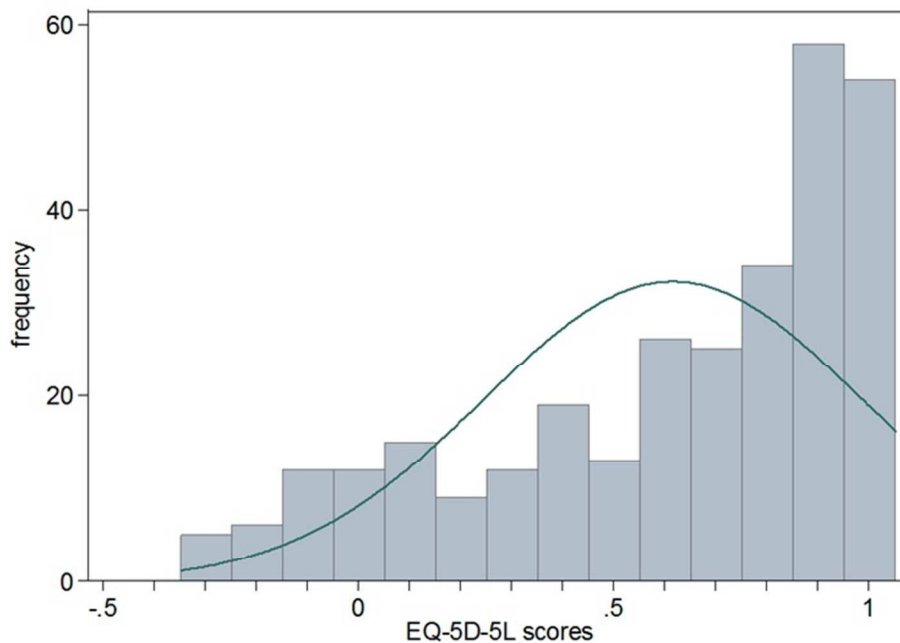

Figure 1 Distribution of the EQ-5D-5L values of CRC patients

Figure 1. Distribution of the EQ-5D-5L utility scores of CRC patients

216x166mm (96 x 96 DPI)

View only

STROBE Statement—Checklist of items that should be included in reports of *cross-sectional studies*

|                              | Item No | Recommendation                                                                                                                                                                                    | detail |
|------------------------------|---------|---------------------------------------------------------------------------------------------------------------------------------------------------------------------------------------------------|--------|
| <b>Title and abstract</b>    | 1       | (a) Indicate the study’s design with a commonly used term in the title or the abstract                                                                                                            | P 2    |
|                              |         | (b) Provide in the abstract an informative and balanced summary of what was done and what was found                                                                                               | P 2    |
| <b>Introduction</b>          |         |                                                                                                                                                                                                   |        |
| Background/rationale         | 2       | Explain the scientific background and rationale for the investigation being reported                                                                                                              | P 4-5  |
| Objectives                   | 3       | State specific objectives, including any prespecified hypotheses                                                                                                                                  | P 5    |
| <b>Methods</b>               |         |                                                                                                                                                                                                   |        |
| Study design                 | 4       | Present key elements of study design early in the paper                                                                                                                                           | P 5-7  |
| Setting                      | 5       | Describe the setting, locations, and relevant dates, including periods of recruitment, exposure, follow-up, and data collection                                                                   | P 5-7  |
| Participants                 | 6       | (a) Give the eligibility criteria, and the sources and methods of selection of participants                                                                                                       | P 5    |
| Variables                    | 7       | Clearly define all outcomes, exposures, predictors, potential confounders, and effect modifiers. Give diagnostic criteria, if applicable                                                          | P 6    |
| Data sources/<br>measurement | 8*      | For each variable of interest, give sources of data and details of methods of assessment (measurement). Describe comparability of assessment methods if there is more than one group              | P 6    |
| Bias                         | 9       | Describe any efforts to address potential sources of bias                                                                                                                                         | P 6    |
| Study size                   | 10      | Explain how the study size was arrived at                                                                                                                                                         | P 6    |
| Quantitative<br>variables    | 11      | Explain how quantitative variables were handled in the analyses. If applicable, describe which groupings were chosen and why                                                                      | P 7    |
| Statistical methods          | 12      | (a) Describe all statistical methods, including those used to control for confounding                                                                                                             | P 8    |
|                              |         | (b) Describe any methods used to examine subgroups and interactions                                                                                                                               | P 8    |
|                              |         | (c) Explain how missing data were addressed                                                                                                                                                       | P 6    |
|                              |         | (d) If applicable, describe analytical methods taking account of sampling strategy                                                                                                                | P 6    |
|                              |         | (e) Describe any sensitivity analyses                                                                                                                                                             | None.  |
| <b>Results</b>               |         |                                                                                                                                                                                                   |        |
| Participants                 | 13*     | (a) Report numbers of individuals at each stage of study—eg numbers potentially eligible, examined for eligibility, confirmed eligible, included in the study, completing follow-up, and analysed | P 8    |
|                              |         | (b) Give reasons for non-participation at each stage                                                                                                                                              | P 8    |

|                          |     |                                                                                                                                                                                                              |         |
|--------------------------|-----|--------------------------------------------------------------------------------------------------------------------------------------------------------------------------------------------------------------|---------|
|                          |     | (c) Consider use of a flow diagram                                                                                                                                                                           | None    |
| Descriptive data         | 14* | (a) Give characteristics of study participants (eg demographic, clinical, social) and information on exposures and potential confounders                                                                     | P 8     |
|                          |     | (b) Indicate number of participants with missing data for each variable of interest                                                                                                                          | P 6/P 8 |
| Outcome data             | 15* | Report numbers of outcome events or summary measures                                                                                                                                                         | P 8-9   |
| Main results             | 16  | (a) Give unadjusted estimates and, if applicable, confounder-adjusted estimates and their precision (eg, 95% confidence interval). Make clear which confounders were adjusted for and why they were included | P 8-9   |
|                          |     | (b) Report category boundaries when continuous variables were categorized                                                                                                                                    | P 18-20 |
|                          |     | (c) If relevant, consider translating estimates of relative risk into absolute risk for a meaningful time period                                                                                             | None.   |
| Other analyses           | 17  | Report other analyses done—eg analyses of subgroups and interactions, and sensitivity analyses                                                                                                               | None.   |
| <b>Discussion</b>        |     |                                                                                                                                                                                                              |         |
| Key results              | 18  | Summarise key results with reference to study objectives                                                                                                                                                     | P 9-10  |
| Limitations              | 19  | Discuss limitations of the study, taking into account sources of potential bias or imprecision. Discuss both direction and magnitude of any potential bias                                                   | P 12    |
| Interpretation           | 20  | Give a cautious overall interpretation of results considering objectives, limitations, multiplicity of analyses, results from similar studies, and other relevant evidence                                   | P 9-12  |
| Generalisability         | 21  | Discuss the generalisability (external validity) of the study results                                                                                                                                        | P 12    |
| <b>Other information</b> |     |                                                                                                                                                                                                              |         |
| Funding                  | 22  | Give the source of funding and the role of the funders for the present study and, if applicable, for the original study on which the present article is based                                                | P 12    |

\*Give information separately for exposed and unexposed groups.

**Note:** An Explanation and Elaboration article discusses each checklist item and gives methodological background and published examples of transparent reporting. The STROBE checklist is best used in conjunction with this article (freely available on the Web sites of PLoS Medicine at <http://www.plosmedicine.org/>, Annals of Internal Medicine at <http://www.annals.org/>, and Epidemiology at <http://www.epidem.com/>). Information on the STROBE Initiative is available at [www.strobe-statement.org](http://www.strobe-statement.org).
